# Rational inattention in mice

Nikola Grujic<sup>1,3</sup>, Jeroen Brus<sup>2,3</sup>, Denis Burdakov<sup>1,3,\*</sup>, and Rafael Polania<sup>2,3,\*</sup>

<sup>1</sup>Institute for Neuroscience, Department of Health Sciences and Technology, ETH Zurich, Switzerland  
<sup>2</sup>Decision Neuroscience Lab, Department of Health Sciences and Technology, ETH Zurich, Switzerland  
<sup>3</sup>Neuroscience Center Zürich, Switzerland  
\*These authors jointly supervised this work

**Behavior exhibited by humans and other organisms is generally inconsistent and biased, and thus is often labeled irrational. However, the origins of this seemingly suboptimal behavior remain elusive. We developed a behavioral task and normative framework to reveal how organisms should allocate their limited processing resources such that there is an advantage to being imprecise and biased for a given metabolic investment that guarantees maximal utility. We found that mice act as rational-inattentive agents by adaptively allocating their sensory resources in a way that maximizes reward consumption in novel stimulus-reward association environments. Surprisingly, perception to commonly occurring stimuli was relatively imprecise, however this apparent statistical fallacy implies “awareness” and efficient adaptation to their neurocognitive limitations. Interestingly, distributional reinforcement learning mechanisms efficiently regulate sensory precision via top-down normalization. These findings establish a neurobehavioral foundation for how organisms efficiently perceive and adapt to environmental states of the world within the constraints imposed by neurobiology.**

Correspondence: [rafael.polania@hest.ethz.ch](mailto:rafael.polania@hest.ethz.ch); [denis.burdakov@hest.ethz.ch](mailto:denis.burdakov@hest.ethz.ch)

Seemingly irrational behavior is surprisingly common in humans and other animals. This has been widely documented in research conducted by neurobiologists, psychologists, and economists, for whom apparent anomalies in the behavior of healthy organisms are difficult to reconcile with idealized statistical and neurobiological frameworks (1, 2). These idealized concepts and theories are increasingly used to guide diagnoses and treatments in the medical domain (3) and policy making in applied economic settings (4, 5), so such anomalies raise an important question: Why are common behavioral strategies so often different from the idealized predictions, and is it reasonable to dismiss such strategies as irrational or suboptimal?

A potential answer to this question might be rooted in a premise that holds across all living organisms: organisms have a limited metabolic budget for interacting with their environments, and thus a restricted capacity to process environmental and interoceptive signals (6). This entails that, for instance, when an organism must decide between various alternatives that promise some reward, the process of choosing the best alternative must be based on imprecise and biased perceptions (7–9). However, it remains poorly understood how organisms can make the best out of such perceptual limitations such that reward is maximized in environments that are uncertain.

One attempt to address this question proposes that in the

course of evolution, the nervous system developed computational strategies that take into consideration the statistical structure of the environment and the uncertainty of sensory signals. For instance, theoretical (10), behavioral (11–13) and recent neurophysiological (14, 15) studies support the idea that the brain learns a statistical model of the world and optimally combines this knowledge with imperfect sensory information, and thus approaches optimal computations under uncertainty. However, this approach does not take into consideration the biological limitations of information processing in the nervous system.

This problem has received considerable attention in recent years, when the principles of efficient computation under uncertainty and cognitive limitations can be studied in the rational inattention or resource-rationality framework (16, 17). This approach has been instrumental in accounting for various aspects of behavior that were not possible to explain with rational models not only in decisions relying on basic sensory perception (18, 19) and memory (20, 21), but also in higher-level processes in humans such as the evolution of language (22) and economic decision-making (23–30).

Rational inattention theory predicts that (i) limited time (31, 32), (ii) noise in the system and environment (33, 34), and (iii) metabolic constraints (35) all limit access to information. Consequently, a decision maker may often benefit from violating the axioms of rational modeling frameworks (36–39) by being rationally myopic and ignoring information that is not worth the effort of processing (26, 27, 30, 40). These apparently suboptimal strategies may ultimately lead organisms to maximize their chances of survival. (41, 42).

Nonetheless, formulations of rational inattention, which have to date been applied predominantly in economic settings, often do not display close conformity with neurobiological implementations. Moreover, in some cases these formulations may not be directly translatable to applications of optimal allocation of attentional resources in sensory perception (43). Additionally, previous formulations leave unclear how organisms efficiently adapt and exploit novel stimulus-reward associations when sensory information varies in its reliability. In other words, what computations can allow organisms to allocate their limited neural resources in an adaptive manner based on experience of reward and punishment? Here, we developed a general modeling framework to study how organisms endogenously allocate their attention with limited resources such that reward consumption of the organism is maximized when it interacts with the environment under uncertainty.

Formal tests of rational inattention have been predominantly tested in humans, and it remains unknown whether such influential concepts can be tested and also hold in lower-order species such as mice. Should this be the case, the availability of genetic tools (44) and large-scale cellular imaging in mice would enable the concepts studied in this work to be used to address various open questions about limited information-processing capacity (45–47) in large-scale experimental settings. This would accelerate the translation from neurobiological mechanisms to formal concepts of rational inattentive behavior in medical settings and applied economics.

To test the neurobehavioral underpinnings of rational inattention, we studied whether mice could be trained to perform a choice task requiring them to make decisions based on ordinal comparisons of orientation stimuli spanning the whole sensory space. This task decouples decisions from sensory information, rendering only measures of relative information relevant. This is essential to consider given that in ecologically valid settings, organisms typically encounter situations in which abstract choices are invariant to specific visual stimuli; for instance, when choosing between stimulus  $A=1$  and  $B=2$  drops of juice, the mouse must choose  $B$ , but between  $B=2$  and  $C=4$ , the mouse must choose  $C$  and not  $B$ . Additionally, we introduced trial-to-trial variability in the reliability of sensory stimuli, and controlled the prior distribution of the sensory inputs such that it matched innate and possibly evolutionary preserved neural sensory codes in mice. During its experimental lifetime, each animal experienced novel stimulus-rewards association rules in different environments while the physical statistics of the environment and task structure remained identical. Controlling and manipulating all these components in the decision task provides a unique opportunity to study whether and how mice learn to adapt their neural coding schemes to maximize reward outcome in each environment without any cues other than trial-by-trial experience.

We found that mice indeed behave as rational-inattentive agents, by taking into consideration their information-processing limitations to develop sensory encoding strategies that lead them to maximize reward consumption. This suggests that many aspects of variable and apparently irrational behavior both in the perceptual and economic domain in fact reflect the efficient use of a limited metabolic budget to operate and interact with the environment.

## Results

**Behavioral task and behavior.** We trained mice ( $n=7$ ) in a two-alternative forced choice task (2AFC), in which they were presented two gratings  $\theta_l$  and  $\theta_r$  (presented on the left and right side of the screen, respectively) and had to choose the one that was more vertically oriented by turning the wheel under their forepaws and thereby moving the grating to the center of the screen (48) (Figure 1B). The two alternatives  $\theta_l$  and  $\theta_r$  are independently drawn from a prior distribution  $\pi(\theta)$  (Figure 1A,B, see below). In order to study the role of sensory uncertainty, we randomly varied the contrast lev-

els for each of the two stimuli across different levels on a trial-to-trial basis (Figure 1B, see methods for details). In the following, we first describe how we derived the prior  $\pi(\theta)$  used in our study, then proceed to explain the experimental paradigm of the decision-making task, and present the descriptive behavioral results.

### **Prior distribution approximation of stimulus orientation in mouse V1.**

In order to specify the prior distribution  $\pi(\theta)$  used in our task, we investigated whether it would be possible to estimate the innate information coding of orientations in the mouse primary visual cortex (V1). To this end, we relied on a large-scale cellular imaging dataset based on simultaneous recordings from  $\sim 20,000$  neurons in mouse V1, while static gratings at a random orientation were presented on each trial (47). Here, we paid particular attention to two pieces of information: (i) the distribution of preferred orientations across V1 cells, and (ii) the neural decoding orientation error of a linear decoder. Regarding the distribution of orientations, the data shows that in mouse V1, a larger proportion of neurons are dedicated to code horizontal relative to vertical orientations for static stimuli (Figure S1A). Based on this result, theories of efficient neural coding predict: (i) decoding error should be larger for orientations with less neural resources, thus higher decoding error for vertical orientations in mice, and (ii) this decoding error shape across the sensory space should be amplified for shorter exposure to sensory stimulation (19, 49). In line with these predictions, the data shows that decoding error was higher for vertical than horizontal orientations, and this pattern was further amplified in the condition with shorter stimulus presentation (Figure S1B). These results confirm that mice appear to dedicate more neural resources to encode horizontal relative to vertical orientations. We speculate that this prior distribution could have been induced in mice by evolution (or perhaps life-experience) due to their anatomy and morphology. However, this notion would need to be more formally tested in future studies, for instance as previously studied in cats, a species that appears to be more exposed to horizontal than vertical orientations in their natural environment (Figure S1C).

Based on these analyses, here we specified the distribution of orientations  $\pi(\theta)$  such that horizontal angles were more common than vertical angles (Figure 1A). This allowed us to focus our analyses on studying how mice adopt reward-maximizing coding strategies based on specific reward-stimulus contingencies, while preserving prior neural codes that appear to be innately present in mouse early visual areas.

### **Mice can perform ordinal comparisons under uncertainty in a continuous sensory space.**

In the 2AFC task, orientations of the two gratings were drawn from distribution  $\pi(\theta)$  (Figure 1A). For all conditions tested in this study, mice had to choose the grating that was more vertically oriented, and received a reward  $R$  (a given amount of milkshake) if and only if a correct decision was made. Rewards were based on three

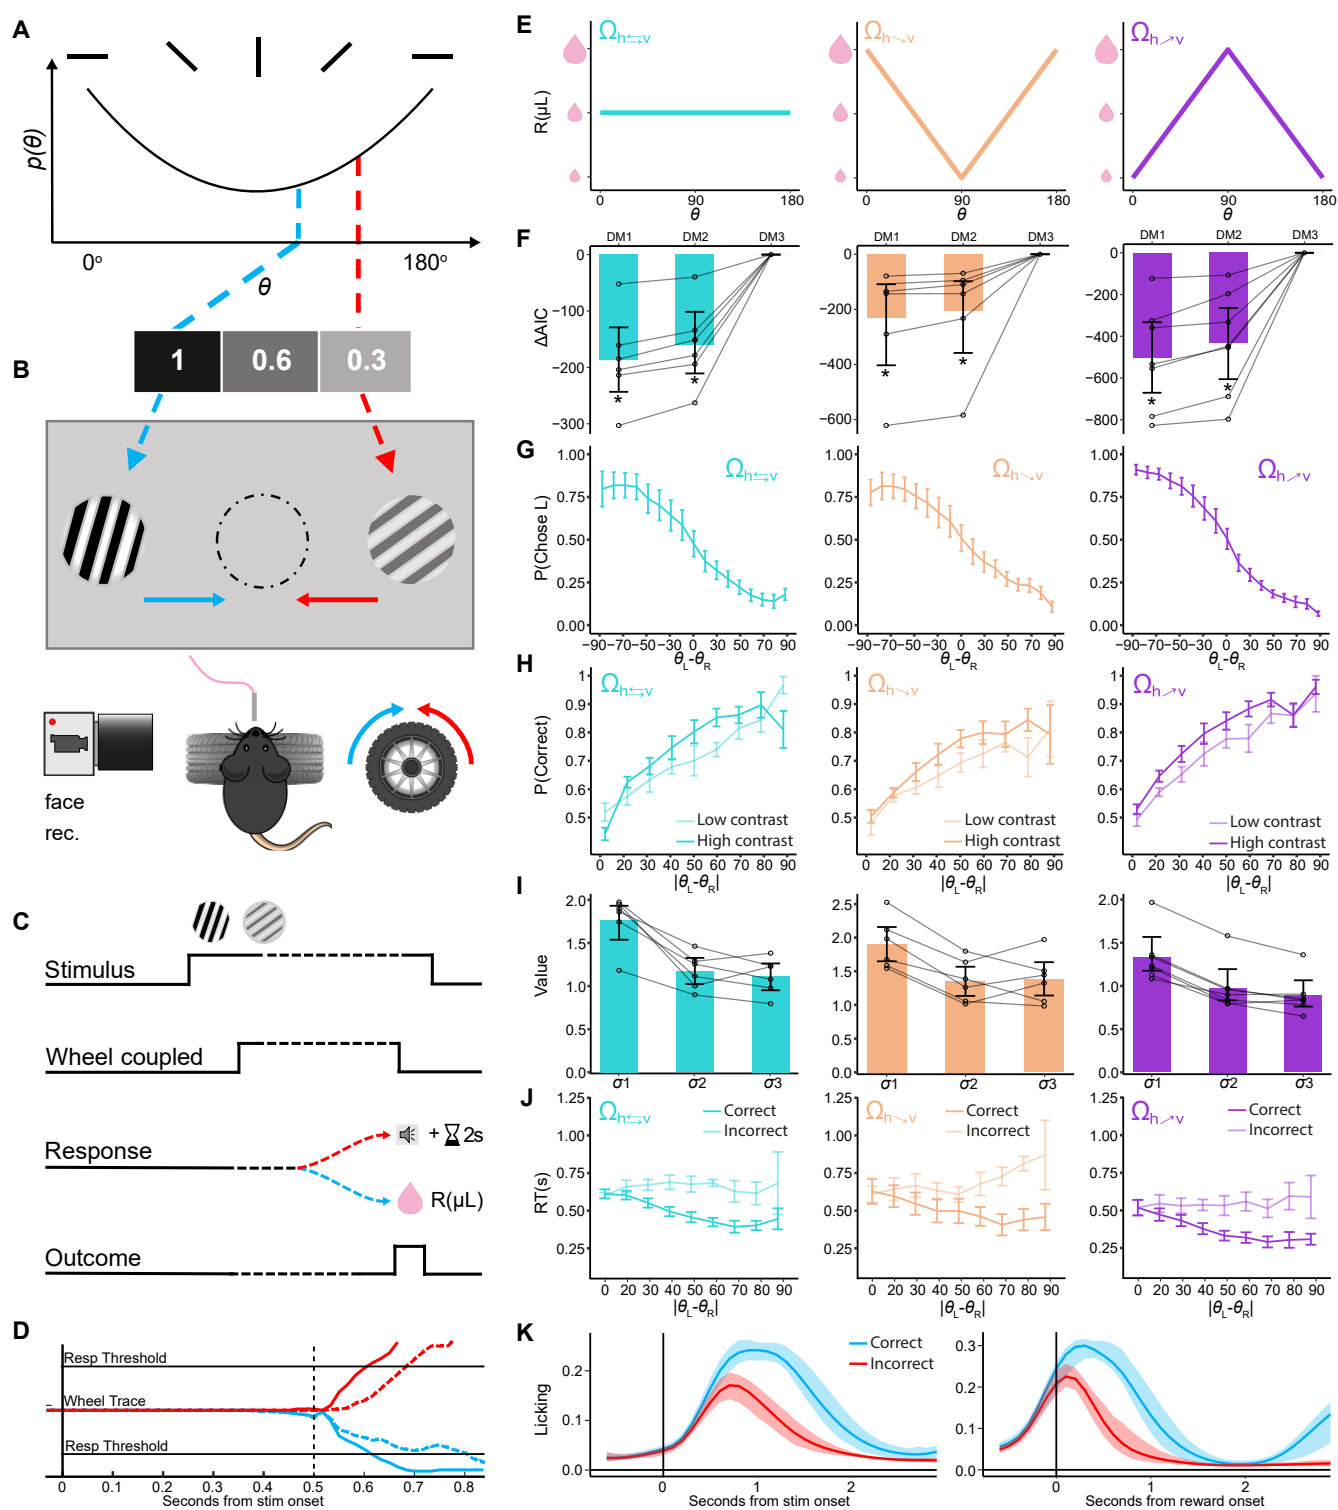

**Fig. 1.** (A, B, and C) The illustration of the animal setup and procedure. (A) Two orientations were picked from a prior distribution and their contrast levels were modified independently across 3 levels. (B) The animal must turn the wheel to move the grating that is more vertically oriented to the middle of the screen to obtain a milkshake reward. (C) Trial timeline, and outcomes for correct and incorrect responses. For 0.5 seconds after stimulus onset the wheel is not coupled to the stimulus positions. (D) The median wheel trace for correct (full line) and incorrect (dashed line) trials. Trials picking right side plotted in red, and left side in blue. (E) The three stimulus-reward mapping conditions  $\Omega$  considered in this study. (F) Comparison of AICs (Akaike Information Criterion) the three descriptive models (DMs) and the 3 reward mappings (Methods). AICs from each model were subtracted from the best fitting model (DM3). Individual mice are shown with transparent gray lines. Error bars represent bootstrapped 95%-CI of the mean across mice. (\*) represents models for which the bootstrapped 95%-CI AIC difference is below zero. (G) Psychometric curves for three reward mapping conditions. Mouse data is in the colour of the condition. (H) Percentage correct across difficulties for low contrast trials (semitransparent, sum contrasts < 1) and high contrast trials (solid, sum contrasts > 1). Only trials with equal contrast for left and right side stimuli are included. (I) Contrast noise assigned to each contrast level in DM3 ( $\sigma_1, \sigma_2$  and  $\sigma_3$  for contrast values 0.3, 0.6 and 1, respectively). Higher weight means greater noise in the orientation estimate according to DM3. Individual mouse weights plotted as semitransparent lines. (J) Mean reaction times across difficulties for correct (solid line) vs incorrect trials (semitransparent line). In panels G-J error bars represent s.e.m. (K) Extracted licking data aligned to stimulus onset (left) and reward onset (right). Correct trials are plotted in blue, and incorrect trials in red (shaded area represent s.e.m.).

different stimulus-reward association environments  $\Omega$  (Figure 1E, Table S1). After mice reached stable behavior in a baseline decision task, mice performed between 20-50 sessions in each environment  $\Omega$  (methods).

In environment  $\Omega_{R:h \Rightarrow v}$ , mice received a fixed amount of milkshake for correct decisions irrespective of orientation (Figure 1E, left panel). This condition corresponds to the reward contingencies classically implemented in perceptual decision-making tasks. In environment  $\Omega_{R:h \nearrow v}$ , more vertical orientations yielded higher rewards for correct decisions via a linear relationship (Figure 1E, right panel). Given that vertical orientations occur less often than horizontal orientations, this context emulates ecologically-valid settings of economic decisions, where stimuli with higher value occur less often in the environment. Finally, in environment  $\Omega_{R:h \searrow v}$  more horizontal orientations yielded a higher reward (Figure 1E, middle). Recall that in all cases the decision rule is to choose the orientation that is more vertical. Thus counter-intuitively, in any given trial in environment  $\Omega_{R:h \searrow v}$ , mice should choose the orientation that is mapped to the smallest reward, because the other option is less vertical and therefore leads to no reward at all.

First, we investigated based on simple descriptive models whether mice were able to follow the basic decision rule in each environment  $\Omega$  (all models incorporated lapse rates and trial history effects, methods). Using a simple descriptive model (DM1) incorporating the angle difference  $\Delta\theta$  between the input stimuli in a given trial, we found that for all environments  $\Omega$ , mice learned to choose the more vertical orientation (slope of psychometric curve, logistic mixed effects  $P < 0.001$  for all  $\Omega$ , Figure 1G). This indicates that, during their decisions, the abstract choice rule was decoupled from specific sensory information, and relative information was the relevant variable. These results are in principle in accordance with a recent study also showing that mice can apply this sort of abstract decision rules (50).

In a second model (DM2), we investigated whether stimulus contrast impacted mice decisions. As expected, we found that the lower the contrast, the noisier the decisions (mixed effects model, effect of contrast on decision noise  $P < 0.001$  for all  $\Omega$ , Figure 1I). In a third model, we investigated whether in addition to the influence of stimulus contrast on decision noise, the difference in stimulus contrast between the two orientations impacted mice decisions (DM3). In addition to the impact of angle difference and contrast on decision-making, we found that mice had a preference to choose the orientation with higher contrast stimulus (mixed effects model,  $P < 0.001$  for all  $\Omega$ ). This model explained the data better than the simpler models for all mice and all environments (bootstrap 95% confidence intervals (95%-CI) of  $AIC_{DM1} - AIC_{DM3} < 0$  and  $AIC_{DM2} - AIC_{DM3} < 0$  for all  $\Omega$ , Figure 1F). While contrast should not play a relevant role in mice decisions, below we will show that an optimal observer model can account for this apparent risk-averse behavior. Finally, we found that lapse rates were relatively low ( $\lambda = 0.091$ , 95%-CI[0.044,0.14]), suggesting that mice were engaged and followed the decision rules of our task.

For completeness we investigated whether reaction times (RTs) show the behavioral patterns often observed in both perceptual and value-based decision tasks as function of absolute evidence and trial correctness. We found that mice RTs were faster for correct responses (Figure 1J). Also the higher the absolute evidence ( $\Delta\theta$ ), the faster the response for correct decisions (Mixed Linear Model,  $P < 0.001$  for all  $\Omega$ ). These results are in line with chronometric behaviour reported across species both in perceptual and value-based decisions (51–53).

Taken together, the behavior exhibited by the mice in our study indicates that they can learn to perform decision tasks that decouple decisions from sensory information, where measures of an abstract decision rule based on relative information are relevant. Moreover, their psychometric and chronometric behavior strongly suggests that mice employed similar neural mechanisms for guiding their decisions. Next, our goal is to investigate what neuro-computational mechanisms might guide behavior under cognitive limitations.

**Efficient perception and rational inattention.** We developed a framework, based on principles of optimal statistical inference, that allowed us to study how sensory systems should allocate coding resources under the assumption that there is a limit in information processing at two stages of the decision process: (i) limited precision during sensory encoding, and (ii) limited precision in down-stream decision circuits. Crucially, given that the physical prior  $\pi(\theta)$  remains constant, these predictions may be specific to the stimulus-reward associations of a given context or environment  $\Omega$ . Here it is assumed at all times that the goal of the organism is to maximize reward consumption (Figure 2A, see methods for a detailed specification of the model).

Given that noisy communication channels always lose information during transmission, we argue that it is more efficient for the brain to adapt to the reward-maximizing rules of a particular environment at the earliest stages of sensory processing. This notion is supported by evidence suggesting that early sensory systems represent not only information about physical sensory inputs, but also non-sensory information according to requirements of a specific task and the behavioral relevance of the stimuli (54–56). Thus, a key assumption of our framework is that, despite the fact that the physical prior distribution was held constant for all environments  $\Omega$ , sensory codes adapt to environmental demands, possibly via feedback schemes (57, 58).

In brief, we assume that in every trial a mouse obtains a noisy measurement  $m$  independently for each input orientation  $\theta$ . We model the noisy measurements using the von Mises distribution

$$p(m; \theta, c, g) \propto e^{k(c)g(\theta)\cos(\theta-m)}, \quad (1)$$

where the precision of the measurement is determined by two multiplicative factors: (i)  $k(c)$ , which is function of the contrast level for a given orientation, and (ii) a normalized limited-resource function  $g(\theta)$ , determining how many re-

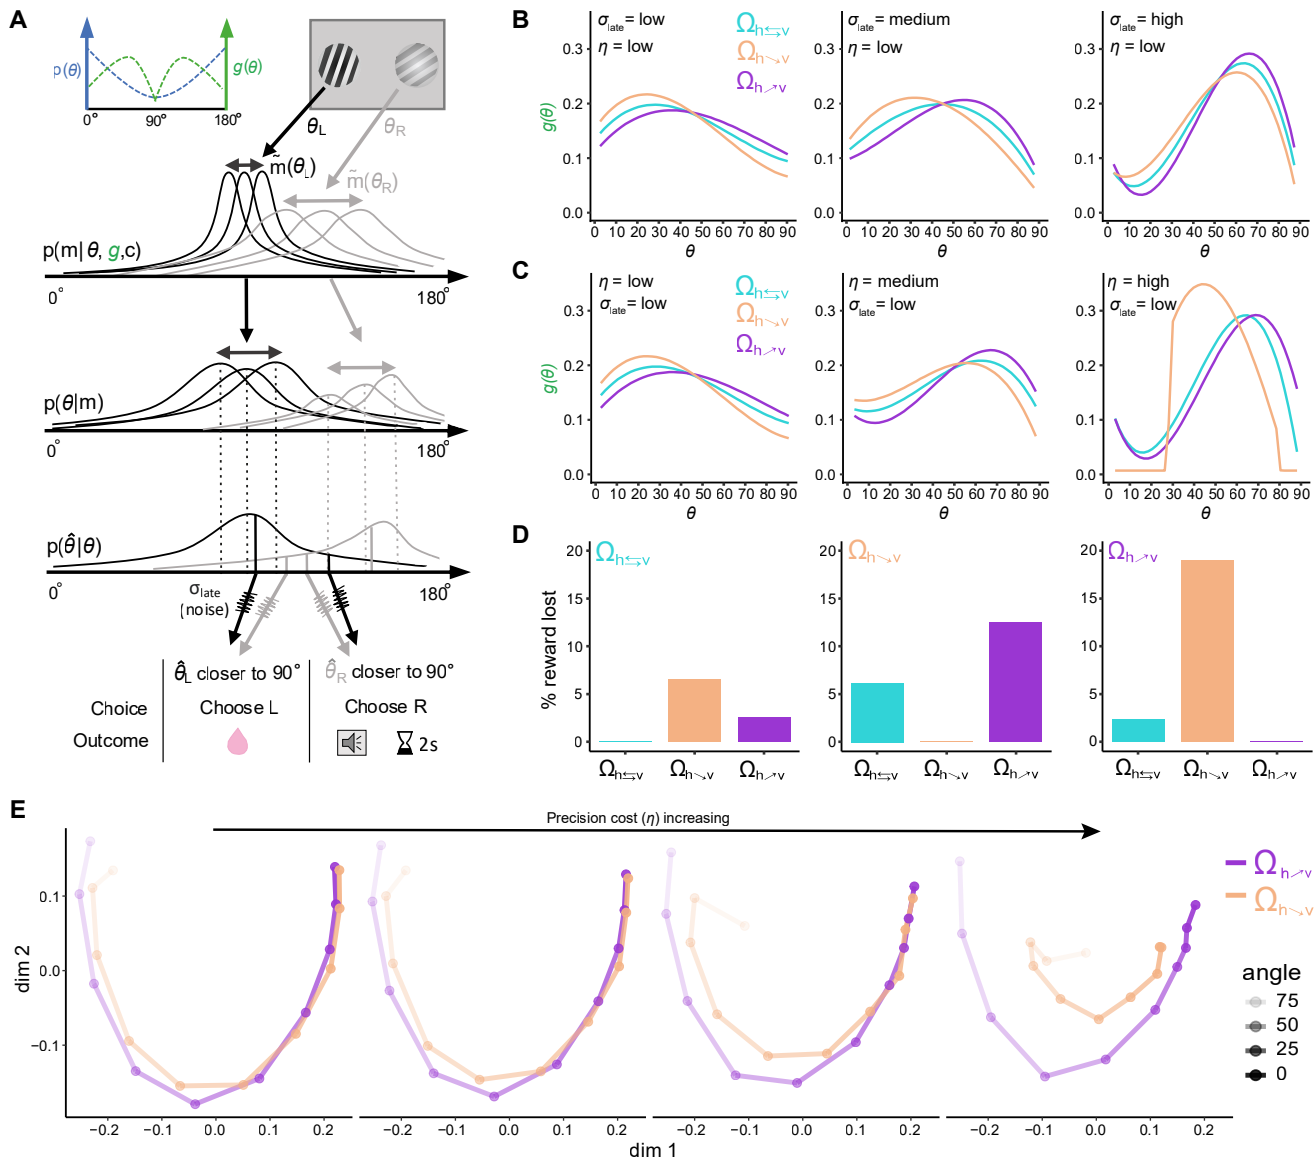

sources the system allocates to a particular segment of the orientation space (methods).

On each trial, the agent computes a posterior distribution  $p(\theta|m)$  by combining the physical environmental prior distribution  $\pi(\theta)$  with the likelihood of the measurement  $p(m|\theta)$  via Bayes rule. Then the agent applies a decoding rule in order to obtain a posterior estimate  $\hat{\theta}$ , which we assume to be the expected value of the posterior distribution  $E[p(\theta|m)]$ , also known as Bayesian least squares (BLS) estimator. We assume that on each trial, the mouse independently estimates  $\hat{\theta}_l$  and  $\hat{\theta}_r$  for the input orientations  $\theta_l$  and  $\theta_r$ , respectively, and then makes a decision based on the abstract decision rule in our task: choose the more vertical angle.

If we constrain  $g(\theta) > 0$  for all  $\theta$  and assume a cost  $K$  generated by the use of metabolic resources to encode visual information (35), one can formulate a well-constrained optimization problem in order to find the optimal allocation of resources in the orientation space for: (i) a given physical environmental prior  $\pi(\theta)$ , (ii) a given contrast response function  $k(c)$ , (iii) reward outcomes associated to decision-outcome rules in a given context or environment  $\Omega$ , and (iv) downstream noise  $\sigma_{\text{late}}$  that is not related to sensory encoding. Formally, the goal is to find a resource allocation  $g^*$ , and the maximum allowed precision/neural-activity  $k_{\text{max}}$  (with an underlying contrast response function  $k(c)$ , see methods) such that

$$\max_{g, k_{\text{max}}} \mathbb{E}[\text{reward} \mid \Omega, k(\mathbf{c}), \sigma_{\text{late}}, \pi] - K(\bar{k}, \eta), \quad (2)$$

where  $\mathbf{c}$  is the set of contrasts that the animal experiences. We model the metabolic cost  $K$  as a function of the average precision  $\bar{k}$  that the agent invests on solving the inference problem, where  $\eta > 0$  indicates how much the metabolic cost scales with average precision  $\bar{k}$  (methods). We argue that this choice of cost function is reasonable when applied to the visual system, given that in our model sensory encoding precision (Eq. 1) can be directly related to the amount of neural activity and its associated variability (13) (methods, Figures S2 and S3). Moreover, it has been recently shown that the relationship between neural activity and energy expenditure in the brain is nearly linear (59).

Here it is important to highlight that an important feature of the rational inattention framework is that allocation of sensory precision ( $g(\theta)$  and  $k_{\text{max}}$ ) does not need to be assumed or manually fitted—as it is often the case in plain Bayesian frameworks where likelihood functions are assumed or manually fitted—but emerge endogenously by assuming an average precision cost  $\eta$  and downstream precision  $\sigma_{\text{late}}$ , alongside the associated (reward) loss that the organism experiences (Methods).

**Optimal resource allocation depends on both sensory encoding precision and down-stream noise.** We studied whether the optimal limited-resource allocation function  $g$  depended on the amount sensory precision cost  $\eta$ . Additionally, we also studied the dependence of  $g$  on sources of down-stream noise  $\sigma_{\text{late}}$ , as recent evidence suggests that lim-

its of sensory perception in mice might be also related to downstream neurocomputational imprecision (47), possibly related to computational limitations of downstream decoders and other forms of irreducible noise in the system (33). Here, we would like to emphasize that a key feature of our study is that for all three different stimulus-reward environments  $\Omega$ , the physical prior  $\pi(\theta)$  was always the same, and therefore, potential differences in resource allocation  $g(\theta)$  must be related to internally improving sensory representations of the learned associations that maximize reward expectation. In order to derive the optimal  $g$  functions for a particular combination of  $\eta$  and  $\sigma_{\text{late}}$ , we used the exact distribution of stimuli inputs used in the mice experiments.

We found that in general for low levels of downstream noise  $\sigma_{\text{late}}$  and relatively low costs in encoding precision  $\eta$ , more resources should be allocated to segments of the orientation space with higher prior  $\pi(\theta)$  density (Figure 2B, left panel). This result is in line with previous studies suggesting that in the limit of low sensory noise (i.e.,  $\eta \rightarrow 0$ ), encoding precision should be higher for segments of the orientation space with more density (19, 60). For instance, it can be shown that for the case of perceptual tasks with constant reward delivery per correct trial (i.e.,  $\Omega_{R:h \rightleftharpoons v}$  environment in our study), discrimination thresholds are inversely proportional to the prior distribution, but crucially in the low-noise regime (19, 49). However and surprisingly, as  $\sigma_{\text{late}}$  increases the predictions of these analytical solutions breakdown, and agents should start to be myopic to segments of the sensory space where the prior's density is high (Figure 2B, middle and right panels). Similarly, assuming no downstream noise (i.e.,  $\sigma_{\text{late}} = 0$ ), but instead varying the levels of sensory noise reveals a similar but qualitatively different pattern of optimal resource allocation strategies as a function of sensory precision costs (Figure 2C, Figure S2,3,4). Thus, these predictions reveal two important features of the rational inattentive agent. First, optimal resource allocation does not only depend on the level of encoding precision of sensory signals, but also on stimulus independent downstream noise. Second, long-held conceptions that neural resources should always be allocated to spaces with higher prior density do not necessarily hold beyond the low-noise regime.

Why are more resources allocated away from high prior density spaces when precision cost and downstream noise are relatively high? On the one hand for the case of high precision cost, low levels of encoding noise generate higher levels of Bayesian attractive biases. Thus, optimal solutions of the rational inattention model reveal that if the system has the opportunity to flexibly modulate its sensory gain, then it pays off to put more weight at places of the sensory space that avoid poor discriminability due to overall attractive biases. In order to provide a better intuition behind this result, we carried out geometric analyses of psychophysical performance based on multidimensional scaling (MDS) (Figure 2E and Figure S5). MDS reveals that the effect of attractive biases for high precision costs are compensated by expanding the discriminability of orientations located at intermediate levels of verticality. On the other hand, for the case of high down-

stream noise, augmenting precision at the edges of this space does not increase the discriminability of neighbouring orientations beyond the most vertical and most horizontal orientation. That is why for relatively high levels of noise there is preference to allocate more attentional resources to rather intermediate levels of cardinality (Figure 2E and Figure S5).

While this pattern is similar for all environments  $\Omega$  considered here for a given combination of  $\eta$  and  $\sigma_{\text{late}}$  (Figures 2B,C and Figure S2), there are important differences in the resource allocation functions  $g$  between environments. We found that resource allocation has a tendency to be relatively higher for more vertical angles in environment  $\Omega_{R:h \nearrow v}$  (Figure 1E, middle panel), however this requires sacrificing precision at more horizontal orientations. This pattern reverses for environment  $\Omega_{R:h \searrow v}$ . This result intuitively makes sense, given that in environment  $\Omega_{R:h \nearrow v}$ , more vertical angles deliver more reward, and therefore mice are better off at giving up encoding precision for horizontal orientations even if they occur more often. Another key prediction of the rational inattention framework is that for environment  $\Omega_{R:h \nearrow v}$  the system should allocate more resources to solve decision task relative to  $\Omega_{R:h \searrow v}$  (this is evident in the MDS analyses where nodes of the manifold are more separated in  $\Omega_{R:h \nearrow v}$  relative to  $\Omega_{R:h \searrow v}$ ). This prediction emerges in the rational inattention framework because the relative allocation of resources under our inference framework leads to slightly higher reward expectation in environment  $\Omega_{R:h \nearrow v}$  relative to  $\Omega_{R:h \searrow v}$ . We also considered rational inattentive model that does not allow a variable and adaptive gain function  $g$  across the sensory space, but instead we assume it to be constant. While this model captures the effect where in environment  $\Omega_{R:h \nearrow v}$  the system allocates more resources to solve decision task relative to  $\Omega_{R:h \searrow v}$ , this model does not account for tradeoffs in discriminability between horizontal and vertical spaces across environments (Figure S6). Moreover, the MDS manifold is more spread for the  $g$ -variable model in relation to the  $g$ -constant model, thus suggesting higher efficiency in the  $g$ -variable (compare manifold spread in Figures S5 and S6).

Finally, we investigated what is the actual benefit of applying the most efficient resource allocation in a given environment. Using average parameters of model fits to the mice data (see below), we found that agents could lose around 10-20% of reward, if resources are not optimally allocated (Figure 2D). This confirms that efficient resource allocation under uncertainty and cognitive limitations is critical to maximize reward.

**Adaptive rational inattention in mice.** First, we investigated whether the rational inattention model that endogenizes  $g(\theta)$  ( $g$ -endog model) provides a better account of the mice data than the best descriptive model (DM3, Figure 1F). We found that the  $g$ -endog model provides better fits to the data for all environments (bootstrap 95%-CI of  $AIC_{\text{RI}} - AIC_{\text{DM3}} < 0$  for all  $\Omega$ , Figure 3A). Notably the rational inattention model has the same number of parameters as the best descriptive model. Therefore, the quantitative differences in goodness of

fit between the two models is not related to model complexity. Inspection of the  $g$  functions across mice for each environment follow the counter-intuitive qualitative predictions of the theory for non-negligible sensory and late noise in our task: More resources are allocated to angles close vertical relative to horizontal orientations (Figure 3C). Additionally, more resources are allocated to vertical orientations in environment  $\Omega_{R:h \nearrow v}$  (higher reward for more vertical angles, Figure 1E) relative to the other environments, while the opposite is the case for  $\Omega_{R:h \searrow v}$  environment (cluster-corrected  $P < 0.05$ ; Figure 3C). These results strongly suggest that the manner in which mice allocate attention in light of their limited coding resources—in the presence of encoding and precision noise—follows the signatures of the resource-limited observer model. Additionally, we found that the levels of apparent risk aversion behavior observed in the descriptive model (DM3, see above) can be largely explained by the rational inattention model (Figure 3B).

In order to make sure that the shapes and differences in resource allocation  $g$  are not a product of the endogenous solutions of the optimal models, we fitted a version of our inference model that does not endogenously restrict the shape of  $g$ , but is fit in a model-free fashion (methods). This model reveals two striking results: First, the qualitative shape of resource allocation  $g$  across environments is similar to the optimal solutions (more resources are allocated away from segments of the sensory space with high prior  $\pi(\theta)$  density). Second, mice allocated their limited coding resources in a way that resembled the signatures of reward-maximization in each environment  $\Omega$ . More specifically, we found that (i) in environment  $\Omega_{R:h \nearrow v}$  (more reward for more vertical angles) resource allocation was relatively higher for vertical angles, (ii) this pattern reversed for  $\Omega_{R:h \searrow v}$ , and (iii) resource allocation in environment  $\Omega_{R:h \rightleftharpoons v}$  was located in between the other environments (see pairwise comparisons in Figure 3D,  $P < 0.05$  cluster-corrected). Crucially, model comparison between the  $g$ -endogenous model and the  $g$ -free model reveals that the complexity of freely capturing the shape of resource allocation  $g$  is not necessary (bootstrap 95%-CI of  $AIC_{g\text{-endog}} - AIC_{g\text{-free}} < 0$  for all  $\Omega$ , Figure 3A). In addition to these quantitative results, our model also accounted for various qualitative features of mice behavior (Figure 3E, and Figure S7) as it is also evident based on MDS analyses, which reveal that the  $g$ -endog model closely resembles the geometry of psychophysical performance of the real data (Figure 3F). Here, two key predictions of the rational inattention model are observed in the behavioral data: (i) geometric distance of the nodes in the MDS manifold at horizontal orientations is shorter for environment  $\Omega_{R:h \nearrow v}$  relative to  $\Omega_{R:h \searrow v}$ , and (ii) geometric distance is larger for environment  $\Omega_{R:h \nearrow v}$  relative to  $\Omega_{R:h \searrow v}$  (see Figure 2E). These results suggest that mice indeed adopt efficient rational-inattentive perception according to the reward contingencies of a given environment.

Finally, We compared the results of the endogenized model ( $g$ -endog), with an ideal observer model in which resource allocation was uniform across the whole sensory space ( $g$ -const model). We found that the  $g$ -endog model accounted better

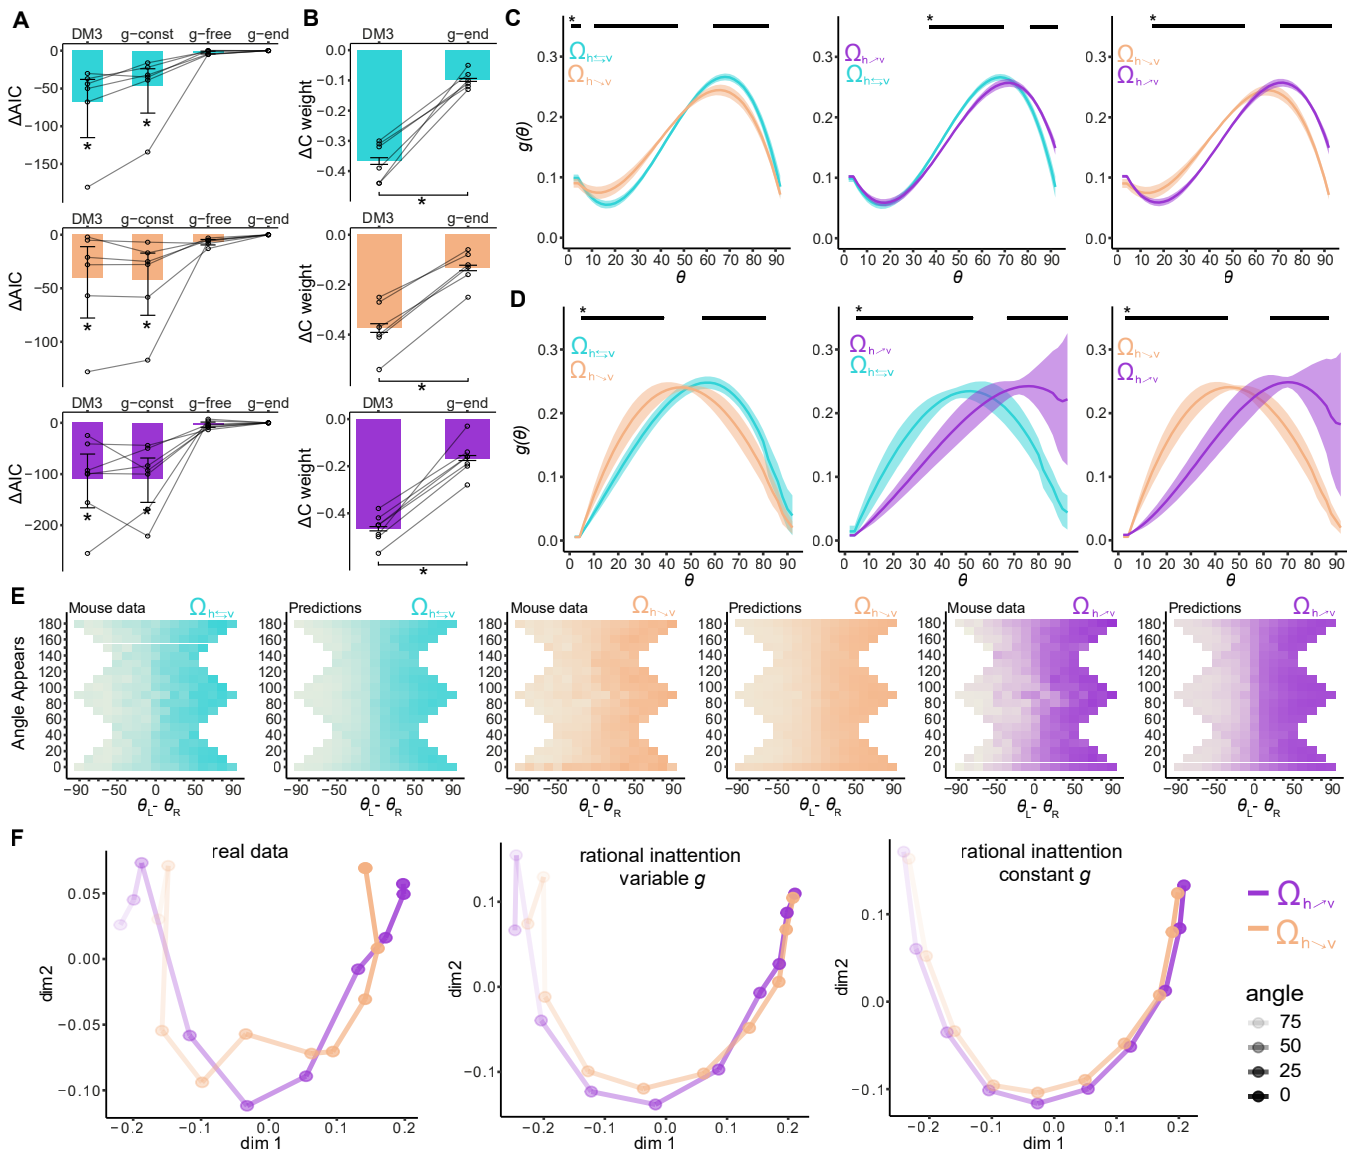

**Fig. 3.** (A) Model comparison based on the AIC reveals that the rational inattention model provides the best account of the behavioral data for all environments  $\Omega$ . The figure shows the difference in AIC relative to the  $g$ -endogenized rational inattention model ( $g$ -end). Error bars represent the bootstrap 95%-CI across mice, and individual mice are shown with transparent lines. (\*) Denotes bootstrap 95%-CI significant difference vs the  $g$ -endogenous model. There is no difference between the model that endogenizes  $g$  and the non-endogenized  $g$  model, suggesting that model complexity that arises by freely fitting  $g$  is not necessary. (B) Probit weights capturing the influence of contrast difference between the two stimuli on choice. Large part of the apparent risk aversion observed in the best descriptive model DM3 (i.e. preference to choose the stimulus with higher contrast) is captured by the rational inattention model. Error bars represent s.e.m., and individual mice marked by transparent lines. Asterisk denotes significant differences (mixed effects model,  $P < 0.001$ ). (C,D) Pairwise comparisons of resource allocation functions  $g(\theta)$  for each reward environment. Black lines on top (marked with an asterisk) signal significant differences as determined by bootstrap 95%-CIs of within mouse differences. Panel C shows results for  $g$ -endogenized model and panel D for the non-endogenized model. See Figure S8 for individual mice data. (E) Heatplots for each reward environment showing probability of choosing the left stimulus at each possible orientation appearing in the study vs. the angle difference (trial difficulty). Model predictions and real mouse data are shown. Data and model predictions show overall good agreement. See Figure S7 for data split based on different contrast levels. (F) MDS analyses of real data and model fits reveal that the rational inattention model allowing adaptive  $g$  across the sensory space has a psychophysical geometry that closely resembles the real data. On the other hand, the rational inattention model that assumes a constant gain  $g$  cannot account for various discriminability features observed in the data.

for the data than the  $g$ -const model for all mice and all environments  $\Omega$  (bootstrap 95%-CI  $AIC_{g\text{-endog}} - AIC_{g\text{-const}} < 0$  for all  $\Omega$ , Figure 3A,F). These results strongly suggest that assumptions in ideal observer models where uniform likelihood functions are adopted (11, 61, 62)—mainly for mathematical convenience—might not always be warranted.

**Adaptive rational inattention via reinforcement learning.** The rational inattention model implemented above assumes that mice have already adapted to a permanently relevant envi-

ronment  $\Omega$ . Hence, the optimal allocation of resources  $g$  remains fixed across trials in a given environment. Therefore, this model does not explain how mice may re-allocate their limited coding resources via trial-to-trial experience. In order to incorporate this fundamental aspect of behavior in our model, we implemented a class of reinforcement learning (RL) mechanism allowing dynamical updating of the resource allocation function  $g$  using operations that appear to be supported by biological neural systems (Figure 4A, see methods for details). In brief, we assume that the animal



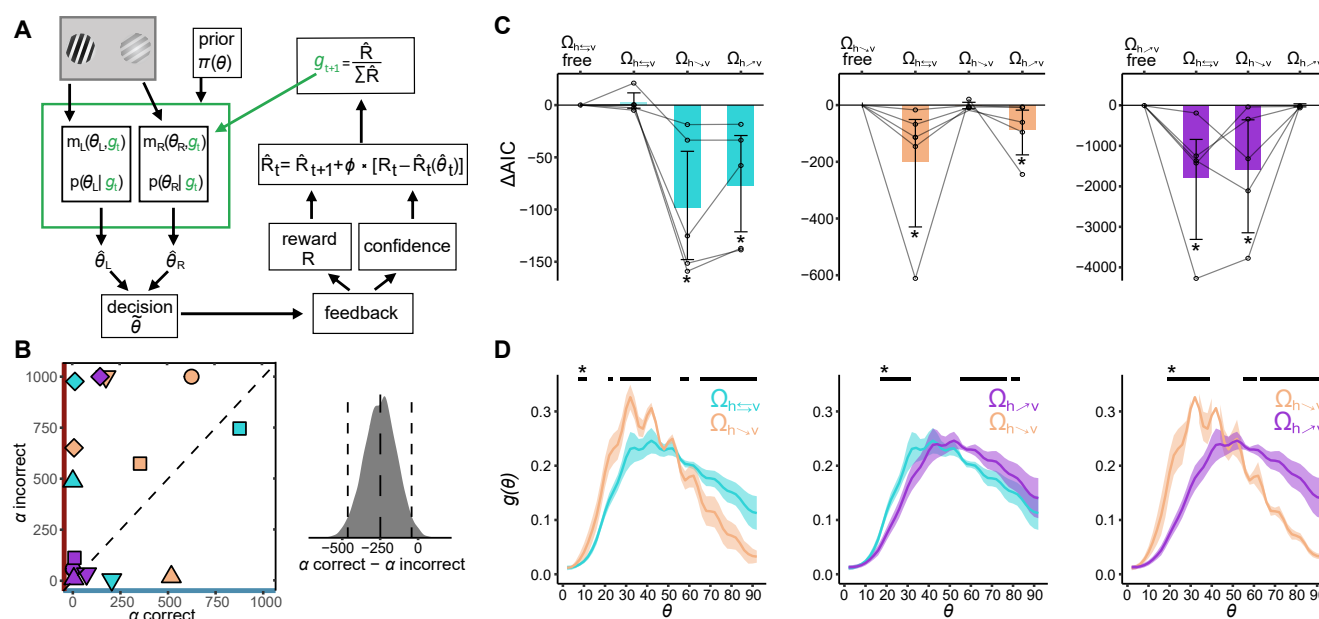

**Fig. 4.** (A) Sketch of the reinforcement learning (RL) model. In brief, after a the observer chooses angle  $\tilde{\theta}$ , the gain  $g$  function is updated following a divisive normalization operation that depends on reward received  $R$ , the level of confidence in the decision and a distributional update of the reward distribution vector  $\hat{R}$ . (B) Left: Learning weights  $\alpha$  for correct and incorrect trials. Individual mice shown with different symbols, and color-coded for condition (see Figure 1D). Right: Distribution of bootstrapped differences of  $\alpha$  for correct and  $\alpha$  for incorrect trials, dashed lines show the mean and bootstrapped 95%-CIs. This result suggests that learning rates are higher for correct choices vs incorrect choices (recall that our model, the learning rates  $\alpha$  are divisive, and therefore, lower values indicate higher learning rates). (C) AIC difference between the  $g$ -endogenized model and the learning model for each environment  $\Omega$ . Learning parameters are in each subplot from left to right swapped for each condition shows that there were no difference between the endogenized rational inattention model and the learning model in its corresponding environment  $\Omega$ . Semitransparent lines show the AIC differences for each mouse and error bars represent the bootstrapped 95%CI across mice. Significantly different models denoted by an asterisk. (D) Resulting gain functions  $g$  from the RL model averaged for the last 500 trial in each environment  $\Omega$  for each mouse and then averaged across mice. Error bars represent s.e.m., and black lines on top show significant differences evaluated by studying whether the bootstrapped 95%-CIs of within subject differences do not cross zero.

updates—based on experience—a distribution of rewards associated to sensory information, for instance in the VTA (63), or any other downstream circuit performing similar operations. After a mouse makes a decision, the animal updates the reward distribution using a form of distributional updating (see methods). Crucially, the strength of update (i.e., learning rate) is dynamically adjusted according to the confidence level of the decision just made (64). Additionally, based on compelling evidence suggesting that humans learn differently from positive and negative outcomes (65, 66), we investigated whether our mice would show a similar behavior in our task by allowing separate learning rates for correct and incorrect decisions. In the final step, we assume that the brain readjusts the resource-limited sensory gain  $g$  (possibly in early sensory areas) via a top-down divisive normalization operation (67, 68).

If it is the case that the RL model described above converges to the static rational inattention model, we expect a similar allocation of attentional resources  $g$  across environments  $\Omega$  for both models. We found that the average resource allocation functions  $g$  over time showed nearly identical patterns of those found in the static ideal observer model (Figure 3D). Moreover, we found that the set of RL parameters that were fit to each condition improved model fits specifically for the corresponding environment  $\Omega$  (Figure 3C). This suggests that parameters controlling the dynamics of reward-sensory learning are specific to the reward-maximizing rules of a given context. Additionally, the dif-

ference between the static rational inattention and RL models was not distinguishable across mice for all environments  $\Omega$  ( $\Delta AIC(\Omega_{R:h \rightleftharpoons v}) = 2.8[-3.4, 12.4]$ ;  $\Delta AIC(\Omega_{R:h \searrow v}) = -2.8[-12.5, 10.2]$ ;  $\Delta AIC(\Omega_{R:h \nearrow v}) = -4.8[-23.4, 13.6]$ , Figure 3C). Given that the rational inattention model fits the data better than all other models tests here so far, these results suggest that the RL model approximates closely to the solution of the optimal model (bootstrap 95%-CI of  $\Delta AIC < 0$  between RL and all other models except the rational inattention model).

A recent intriguing modeling study found that when updating the value of a chosen options, estimates must be revised more strongly following positive than negative reward prediction errors, as this guarantees that reward expectation is maximized (69). Crucially this effect is amplified when decisions are corrupted by late noise. Given our finding that downstream noise has an important influence in the allocation of limited resources and consequently on decision behavior, we hypothesized that similar to humans (65), learning rates in mice are also higher for correct relative to incorrect decisions in our adaptive resource allocation model. In line with these predictions, we found that learning rates were generally higher for correct relative to incorrect decisions ( $\Delta\alpha = -249.0$ , bootstrap 95%-CI $[-465.6, -41.7]$ , Figure 3B), thus suggesting that apparent irrational learning policies might indeed lead to reward-maximizing strategies.

**Rationally-inattentive neural population codes.** We investigated allocation of neural resources of our sensory task in

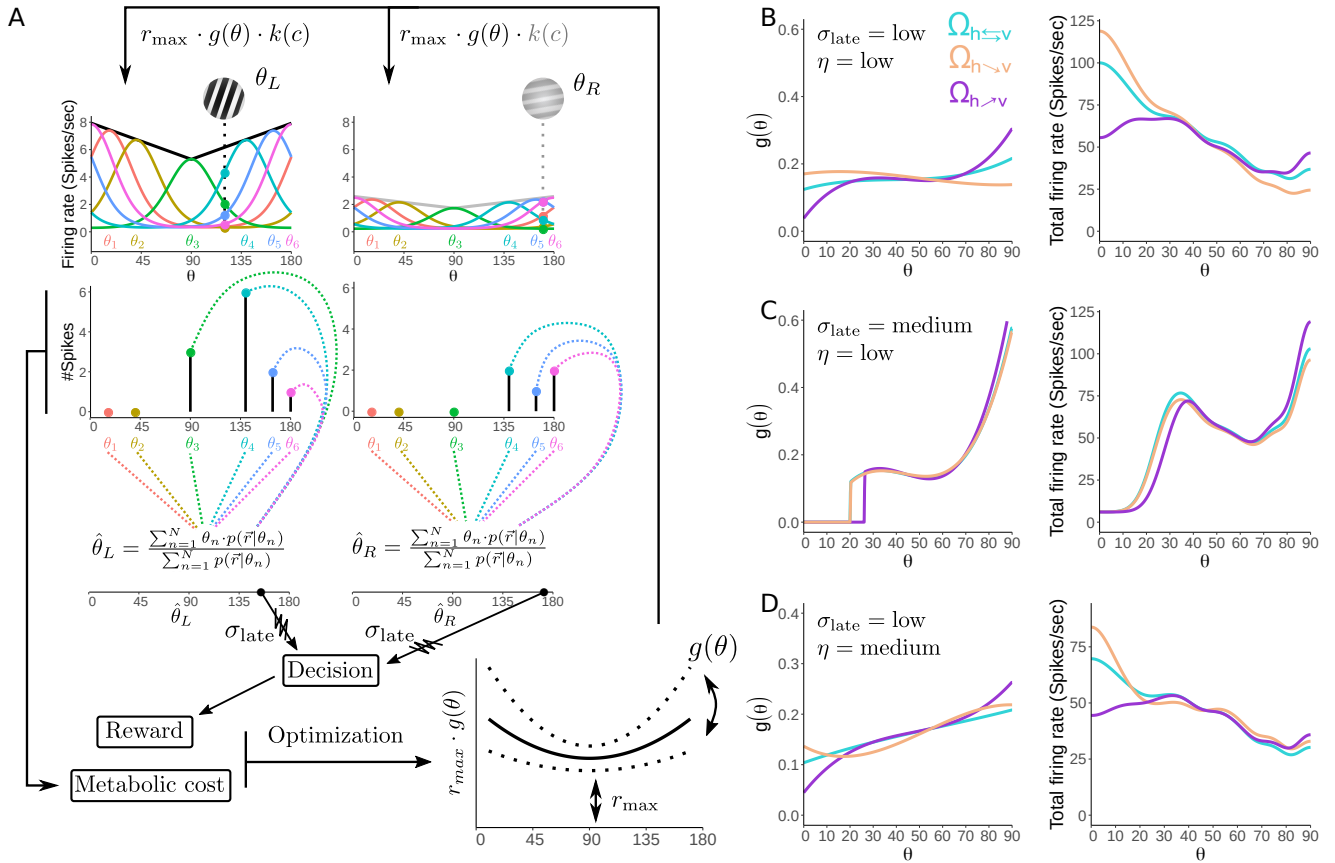

**Fig. 5.** (A) Schematic of the neural network inference process. Top row: the preferred stimuli  $\theta_n$  of  $N = 30$  neurons are spread through orientation space proportional to the prior distribution (for visualization purposes only 6 neurons are depicted). The neurons follow a bell-shaped activation pattern which is modulated by the maximum firing rate  $r_{\max}$  and the resource gain function  $g(\theta)$ . Neural activities are in turn modulated by a contrast response function  $k(c)$ . The two input angles  $\theta_L$  and  $\theta_R$  activate independent and retinotopically specific neural networks. Note that in this example the low activation of the neurons for  $\theta_R$  is a result of low contrast level. 2nd row: the activation of Poisson neurons leads to a number of spikes for each neuron. 3rd row: the BLS estimates of the input angles  $\hat{\theta}_L$  and  $\hat{\theta}_R$  are computed by summing over the preferred orientation of the neurons multiplied by the likelihood. Bottom row: a noisy decision is made based on the BLS estimates of the input angles. The decision leads to a reward conform the choice rule and the reward environment. Both the reward and the metabolic cost originating from the spikes feed into the optimization process which determines the shape of  $g(\theta)$  and the value of  $r_{\max}$ . (B, C & D) Optimal solutions of the limited resource function  $g(\theta)$  for different values of the metabolic cost of a spike and different levels of late noise  $\sigma_{\text{late}}$  for the different environments  $\Omega$  (left) and the resulting total activation (as a function of input angle  $\theta$ ) (right). (B) Low external noise and low metabolic cost. (C) Medium external noise and low metabolic cost. (D) Low external noise and medium metabolic cost. Note that the scale of the y-axis has changed in D) compared to B) and C).

a model that is more closely related to a possible biological implementation. To this end, we implemented a neural network of V1 neurons with Poisson spiking statistics. Thus, an advantage of studying such an implementational architecture is that we can directly study the trade-off between reward intake and the metabolic costs associated to the generation of action potentials in the network (70). Here we provide a brief description of the model alongside the main results (Figure 5A, see methods for more details).

Similar to the algorithmic model, the firing rate of the neurons is determined by two multiplicative factors: (i) maximum activity  $r_{\max}$ , determining the maximum firing rate of the neurons (which is also modulated by contrast input), and (ii)  $g(\theta)$  which determines the firing-rate gain of the neurons. Based on this architecture, it is possible to show that the BLS estimate of the input  $\theta$  can be computed by a sum over the likelihood functions based on the neural activity generated across the network  $p(\vec{r}|\theta_n)$  weighted by the preferred stimuli of the tuning curves  $\theta_n$ . Given that the physical prior distribu-

tion remained constant across the different environments  $\Omega$ , we assume that the neural network incorporates this knowledge in its architecture, such that biologically-plausible computations can be implemented during encoding and decoding operations of the network. One way to achieve this is by assuming that the locations of peak sensitivity of the neurons are spread through orientation space proportional to the prior (60, 71). Conveniently, this strategy can be incorporated by the BLS estimator via the spread of the preferred stimulus locations of the neurons. We assume that these computations occur in parallel by retinotopic specific networks that independently compute the BLS estimates of the two input angles  $\hat{\theta}_L$  and  $\hat{\theta}_R$ . As in the algorithmic model, we allow the possibility to corrupt the estimators with down-stream noise ( $\sigma_{\text{late}}$ ). The decision is associated to a reward outcome conform the decision rule and the reward contingencies of the environment  $\Omega$ . Crucially, we can directly relate the metabolic cost expected amount of spikes generated by the network, which we can assume to be proportional to some metabolic cost per spike  $\eta$  (72). As in the algorithmic model, the goal is to find a re-

source allocation  $g^*$  and a maximum allowed activity  $r_{\max}^*$  such that the trade-off between reward and costs is optimized (see methods and Figure 5A).

Mirroring the results of the algorithmic model, we find that the allocation of resources in the network (measured as firing rates elicited for each input stimulus in the sensory space) depends on encoding noise, late noise, and the environmental context  $\Omega$  (Figure 5B,C,D). For low levels of downstream noise  $\sigma_{\text{late}}$  more resources are allocated to segments of orientation space that correspond to high prior  $\pi(\theta)$  density (Figure 5B,D). This intuitive result is not found when  $\sigma_{\text{late}}$  is increased, instead most resources are located at those regions of orientation space that correspond to low prior density (Figure 5C). Moreover, the neural network will spend less resources in the case that the cost of spiking  $\eta$  is high (i.e., average firing rate decreases, Figure 5D). Thus, this model makes testable predictions for the spiking behavior of neurons in the face of prior densities, stimulus-reward association contexts, and varying levels of encoding and late noise, that can be studied in future imaging studies.

**Arousal-linked efficient regulation of behavioral variability.** Past research has identified that systems regulating arousal levels—such as the locus coeruleus–norepinephrine (LC–NE) system—have a considerable impact on behavioral variability (73, 74). For instance, it has been shown that large pupil baseline (i.e., pupil dilation before trial onset) is associated to slower and less accurate perceptual decisions (75). Moreover, in behavioral paradigms involving uncertain environments, large pupil baselines predict exploratory behavior (76, 77). These findings support the idea that tonic LC–NE modes produce an enduring and largely nonspecific increase in behavioral sensitivity, which promotes flexible and exploratory control states (77).

Based on this evidence, we hypothesized that as for the case of humans, baseline pupil dilation in our task is predictive of task disengagement, that is, more incorrect and slower responses. Based on camera tracking, we analyzed the dynamics of pupil dilation relative to trial onset and its relation to reaction times (RTs) and correct responses (Figure 6C,E, methods). In line with our hypothesis, we found that higher levels of pupil baseline were associated with more incorrect and slower responses in the upcoming trial for all environments  $\Omega$  (Bootstrap 95%-CI < 0 for all  $\Omega$  from -0.75 to 1.5 s relative to stimulus onset, Figure 6B). Given that RTs are usually related to the degree of trial correctness (Figure 1J), we investigated whether the effect of pupil baseline on RT was also present when splitting the data in correct and incorrect trials. We found that the effect of RT was robustly present for both correct and incorrect trials (Bootstrap 95%-CI < 0 for all  $\Omega$  from -0.75 to 1.5 s relative to stimulus onset, Figure 6E). These results confirm that during high levels of tonic arousal, as in humans, mice show signatures of task disengagement. But, what mechanisms support this arousal related behavioral variability?

Recent theories of the LC–NE system suggest that windows of high arousal might be related to adjustments in learning

representations (e.g., in situations of high volatility where learning rates must be up-regulated (78, 79)). But, where does this trade-off occur during decision-making? An advantage of our rational inattention model is that it allows us to separate sensory encoding precision from stimulus-unspecific downstream noise. Therefore, we adapted our model to obtain a joint readout of change in sensory and late noise as a function of pupil baseline (crucially, we can show that the contribution of the two noise sources is identifiable). Strikingly, we found that for all environments  $\Omega$  and all mice, higher levels of pupil baseline resulted in a consistent reduction of downstream choice precision  $k_{\text{late}}$  ( $\Delta k_{\text{late}}(\Omega_{R:h \rightarrow v}) = -0.33\%$  95%-CI: [-0.48, -0.18],  $\Delta k_{\text{late}}(\Omega_{R:h \rightarrow v}) = -0.55\%$  95%-CI: [-0.63, -0.46],  $\Delta k_{\text{late}}(\Omega_{R:h \rightarrow v}) = -0.52\%$  95%-CI: [-0.78, -0.33]; individually estimated MLE 95%-CI < 0 for each mouse in each environment  $\Omega$ ), but not related to changes in sensory precision (Figure 5F,5G).

Given our finding that positive prediction errors are associated with higher learning rates (Figure 4B), and previous reports on the positive relationship between learning rates and tonic arousal (78), we hypothesized that following positive prediction errors, pupil baseline should be elevated. In line with this prediction (and after controlling for confounding factors), we found that positive prediction errors were related to elevated pupil baseline of the following trial (Figure 6E). Conversely, higher levels of phasic pupil response were related to faster reaction times in the current trial (Figure 6E). Thus, these findings suggest that arousal systems in the brain balance the costs associated to larger learning updates with lower precision in downstream circuits while preserving sensory fidelity. This supports previous suggestions of nonspecific increase in behavioral sensitivity during high tonic arousal, which in turn promotes flexible and exploratory control states (76, 77).

**Signatures of reward distribution encoding in arousal systems.** Previous work provided evidence that the arousal system has important and computationally complex roles in rationally regulating the influence of incoming information on beliefs about dynamic and uncertain environments (78). However, it remains unclear whether the arousal system signals the expectation of rewards tied to specific sensory information (which is often distributed across the whole sensory space), irrespective of the expectation of physical sensory signals. Our experimental design allows the possibility to study these arousal-linked computational mechanisms given that the distribution of sensory signals remains identical across the different environments  $\Omega$ , where the only difference across environments is the learnt stimulus-reward association spanning the sensory space.

In order to study this possibility, we investigated phasic pupil responses as a function of sensory-specific reward expectation. First, we obtained the expected reward of each correct-side stimulus by multiplying the frequency of occurrences of these stimuli with their reward value within each reward environment  $\Omega$  (Figure 6H). If it is true that pupil responses signal

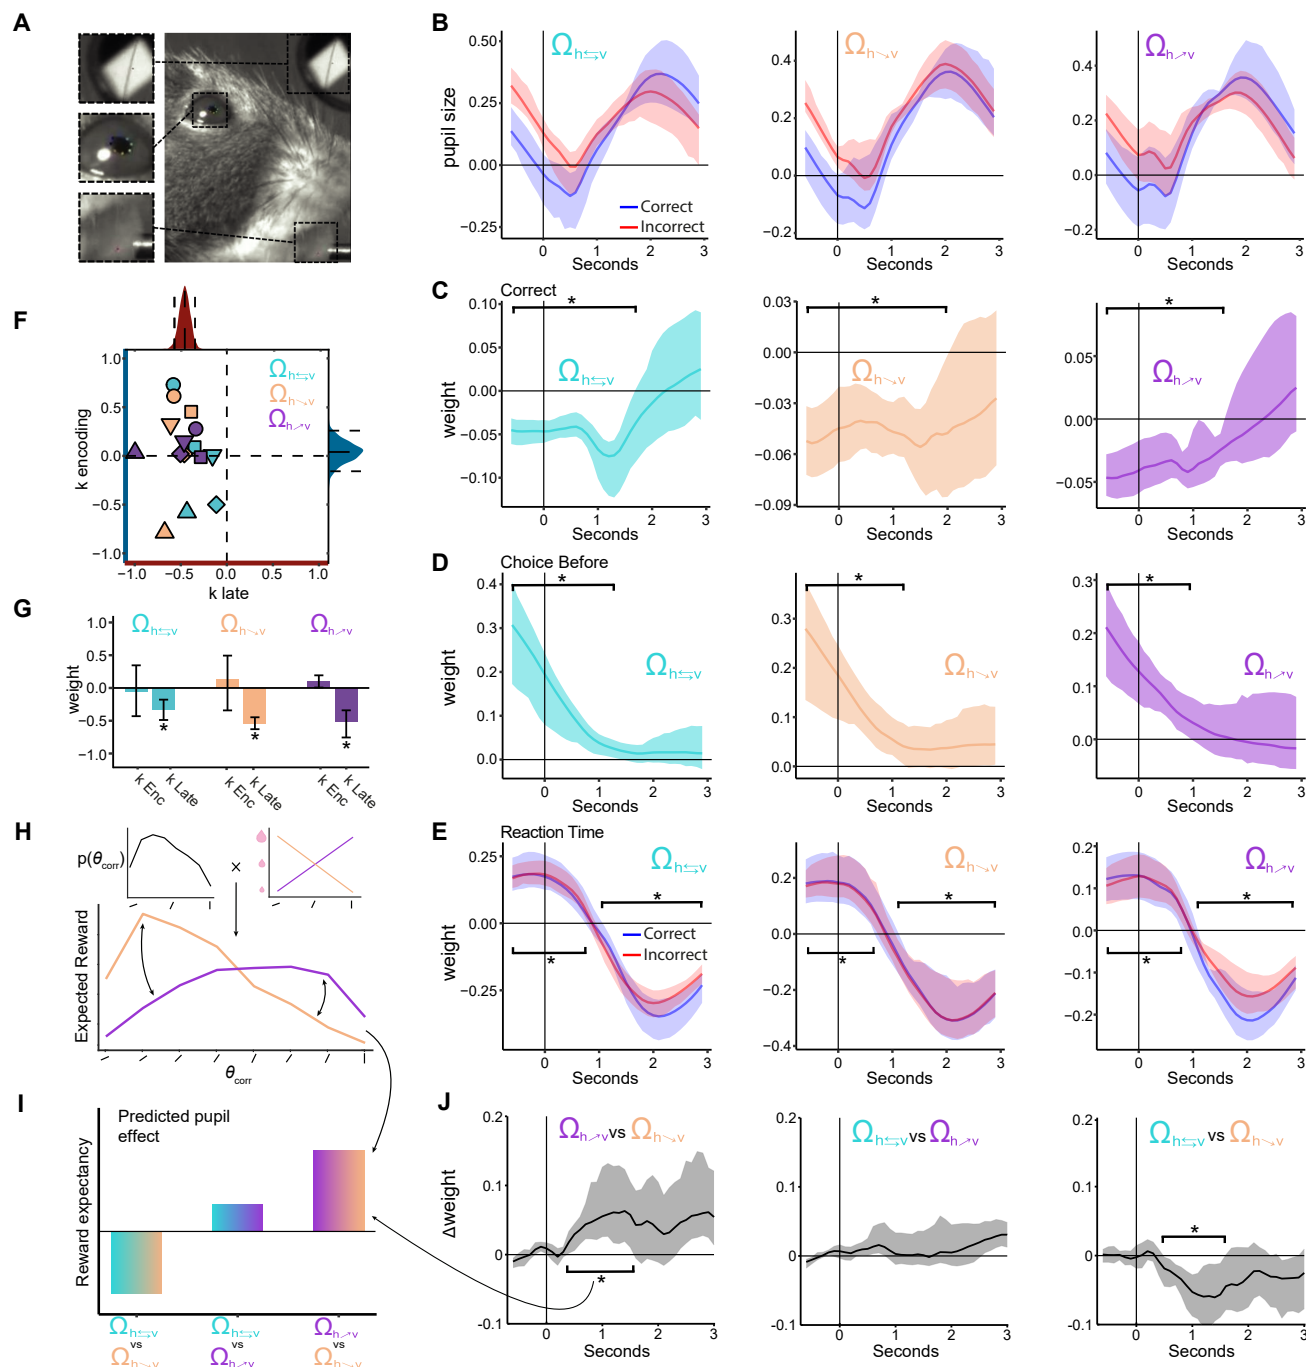

**Fig. 6.** (A) Pupil dilation was extracted from videos acquired during behavioral performance using DeepLabCut. Other relevant variables can be detected such as trial onset (top window), pupil size (middle), and licks (bottom) (B) Average pupil size for each reward environment  $\Omega$ . Blue line shows pupil size for correct and red line for incorrect trials. Shaded area shows 95% bootstrap CIs. (C-E) Coefficient estimates estimated for each time point based on multiple linear regressions with pupil size as the dependent variable and multiple trial parameters as predictive variables (see Methods). Panels show the coefficient estimates over time for trial correctness, correctness on a choice before, and reaction time (where multiple regressions were ran separately on correct and incorrect trials). In panel E it can be appreciated that baseline pupil size predicted slower decisions in the upcoming trial irrespective of trial correctness. (F) Baseline pupil dilation directly impacts downstream noise precision but not sensors precision. Regression weights of sensory trial ( $k$ -encoding) vs. downstream choice precision ( $k$ -late) as a function of pupil dilation before trial onset. Individual mice shown with different symbols, and color-coded for condition (see Figure 1D). Bootstrapped distributions projected parallel to relevant axis with mean and 95% CI shown in dashed lines. (G) Bootstrapped means and 95% CIs for sensory and downstream noise parameters in each reward environment  $\Omega$ . (H) Sketch showing how values for Expected reward were extracted for each correct side angle. The prior distribution of correct side angles is multiplied by the reward mapping of the respective reward environment  $\Omega$ . (I) Sketch of the predicted effect of reward expectancy on pupil size when comparing between environments (i.e., the interaction effect). Arrows pointing to the furthest right bar illustrate the comparison between  $\Omega_{R:h \rightarrow v}$  and  $\Omega_{R:h \leftarrow v}$  reward environments, as otherwise shown in H and J. (J) Pairwise reward environment difference in weights of expected reward to phasic pupil response over time from trial onset. All time bins marked with asterisks are significantly different from 0 (as determined by 95% bootstrap CIs). Interaction patterns closely follow the interaction predictions, suggesting that arousal systems (linked to pupil dilation) potentially encode expected reward distributions in a sensory-specific manner. pupil responses in each environment and individual mice data are shown in Figure S9.

the distribution of reward expectation in an adaptive manner, then we expect an interaction of the pupil responses linked to sensory specific reward expectation across environments (Figure 6H).

We used these values in a per-time-bin linear regression analysis on phasic pupil responses. Critically, we controlled for confounders such as trial difficulty (absolute angle difference), reaction time, correctness on a trial, the probability of appearance of an angle, and licking by including them as regressors. In a within mouse, pairwise comparison, we find a significant difference between the regression weights assigned to expected rewards in different reward environments  $\Omega$  as predicted by our postulated computations (Figure 6I,J). A positive interaction between  $\Omega_{R:h \searrow v}$  and  $\Omega_{R:h \nearrow v}$  is expected, due to the inverted angle-reward mappings between them (Figure 6H,I). The phasic pupil activity reveals such interaction patterns (Figure 6J left panel,  $P < 0.05$  cluster corrected). The opposite pattern is predicted by the comparison between  $\Omega_{R:h \searrow v}$  and  $\Omega_{R:h \Rightarrow v}$  (Figure 6I), which is also confirmed by the phasic pupil responses (Figure 6J right panel,  $P < 0.05$  cluster corrected). On the other hand, the predicted difference between  $\Omega_{R:h \nearrow v}$  and  $\Omega_{R:h \searrow v}$  is relatively small with a slight tendency in the positive direction (Figure 6I). This prediction was also evident in our data (Figure 6J middle panel).

This set of results indicate that pupil size increases with rarity and size of the reward indicated for a give set of sensory stimuli in a given trial. This suggests an indirect link between arousal systems, such as the noradrenergic system of the LC, and reward expectancy, which might guide learning and redistribution of sensory resources via dopaminergic systems. Interestingly, a recent investigation showed that dopaminergic responses are amplified by rarity and size of reward received in a trial (80). In addition, they show that pupil dilation is also sensitive to such rewards after feedback, thus, pointing to a fundamental interaction between noradrenergic and dopaminergic systems to guide efficient learning and decision-making behavior.

## Discussion

When organisms face a decision, choices must be made based on imprecise perceptions arising from the information-processing limitations of the nervous system. We developed a framework to study how organisms allocate attention during sensory encoding, such that there is an advantage to being stochastic, and in some cases myopic to incoming sensory information, because the encoding strategy guarantees that metabolic investment in more precise awareness leads to maximal reward consumption. We formulated the framework as generally as possible while conforming closely with neurobiological mechanisms so that the nature of the neural-coding constraints need not be fine-tuned independently for each particular context. Additionally, we show that the information-processing strategies of a rationally inattentive agent are dependent on two main factors: First, the system has limited capacity to process information, not only

at the early stages of sensory encoding, but also at late stages of the decision-making process. Second, strategies depend on context; in our work, context was defined by the stimulus-reward associations in a given environment, but the stimulus prior remained constant at all times. We found that mice behave as rationally inattentive agents: they take into consideration their information-processing limitations to develop efficient sensory encoding strategies that lead them to maximize reward consumption.

Within the specific structure of our decision task, these rational information-processing strategies lead to results that seem surprising and also appealingly intuitive. When information-processing resources are low for both sensory encoding and downstream decision computations, the rationally inattentive agent is relatively myopic to portions of the stimulus space where the density of the prior is highest. This result goes against concepts of efficient coding, which suggest that the system should dedicate more neural resources to stimuli that occur more often (25, 49, 60, 81, 82). However, these suggestions usually assume that the system has large capacity to process information and that there is no uncertainty in downstream circuits. This prediction also emerges in our task and model under the high resource-capacity assumption, but we argue that these efficient-coding assumptions hold only for cases in which organisms such as humans can process sensory information with high precision and have a perfect understanding of the task with no uncertainty about choice rules or related sources of noise in circuits dedicated to comparison, action, and learning. However, mice cannot follow human instructions and must learn task rules by trial and error, so it is reasonable to believe that behavioral variability in mice is largely impacted by downstream noise (46). Crucially, this counter-intuitive myopic behavior was evident in all the animals tested in this study, in line with the rational inattention framework. Although support for our theory from mice's behavior is encouraging, we believe that these results might have important implications in human decision-making domains where the complexity and understanding of the task structure may be key to interpreting decision-making models. For instance, recent work has shown that a good deal of the variability in behavior of human participants in model-free and model-based learning processes might be rooted in task instructions (83). Thus, it is tempting to speculate that when task understanding is poor, agents may develop apparently deviant coding strategies that might be indeed efficient.

A key prediction of the rational inattention framework developed here is that information-processing strategies change endogenously as a function of stimulus-reward associations in a given environment, despite the fact that the physical environment is held constant across all contexts. Studies of efficient adaptation typically focus on scenarios in which he statistics of the physical environment change while keeping the reward contingencies constant. However, we argue that studying scenarios in which the statistics of the physical environment remain constant is also ethologically relevant, because physical environments are generally stable over long periods of time, whereas stimulus-reward associations may

change more often. We found that mice's characteristic levels of information-processing capacity in sensory and downstream circuits, enabled them to adaptively allocate their limited resources, which appeared to be related to improving learned associations that maximized utility. This led to myopic sensory encoding in various ways depending on the contextual reward-stimulus contingencies, as predicted by the theory.

Recent developments in the neurobiology of efficient information representation suggest that neural codes should not only be tuned by stimulus frequency statistics but also by the stimuli's impact on downstream circuits and ultimately on behavior (29, 41, 42, 82, 84). In line with this intuition, there is evidence showing that early sensory systems represent not only information about physical sensory inputs but also non-sensory information depending on the requirements of a specific task and the behavioral relevance of the stimuli (55, 56, 85). Although we did not record the activity of sensory neurons, our work provides a formal justification for these intriguing observations, where information-processing resources endogenously adapt and reflect the organism's needs. Given that noisy communication channels such as the brain always lose information during transmission, we argue that it is more efficient for the brain to adapt to the utility-maximizing rules of a particular environment at the earliest stages of sensory processing, an intuition that appears to be supported by recent imaging studies (56, 85).

In this work, we studied the possibility that a RL algorithm supported by operations that appear neurologically plausible could provide insights into how information-processing resources could be adaptively and optimally allocated through trial-by-trial experience. We leveraged recent discoveries suggesting that the brain can represent and update information about rewards in a distributional manner (63) and that functional remapping of task-relevant early sensory areas can be achieved with top-down feedback from decision-relevant circuits that encode prediction error signals and task rules (85). Interestingly, recent work revealed that dopamine neuron ensembles generate activity patterns that signal sensory-specific prediction errors (86), thus providing further support for our algorithmic architecture. Finally, adjustment of sensory gain is achieved via divisive normalization (87), an operation that has been related to the implementation of optimal attentional reallocation (67). We found that an algorithmic architecture of this kind allocates sensory resources in a context-dependent manner, similar to the patterns predicted by our rational inattention theory. Although in this model sensory resources are allocated dynamically and thus endogenously through trial-to-trial experience, in our current RL specification the parameters determining the learning rates are not endogenously estimated, but fitted to the data. A similar problem emerges with the original specification of distributional reinforcement learning (63): the agent needs to find a probability distribution consistent with the set of optimal updating operations, which requires a precise coordination in every time step of all neurons involved in RL computations. Although recent computational formulations provide

hints how this problem could be tackled (88–90), it remains unclear how to connect these distributional RL computations to a biologically plausible algorithm that applies to arbitrary stimulus-reward association contexts such that reward expectation is maximized. This topic deserves attention and should be studied further.

Our computational model allowed us to investigate the role of adaptive regulation of the arousal system on sensory and non-sensory downstream imprecision. This approach revealed that nonspecific increase in behavioral sensitivity is associated with high levels of tonic arousal, but not directly related to sensory sensitivity. These results indicate that arousal systems may balance the costs associated with larger learning updates, which lead to high tonic arousal states and lower precision in downstream circuits while preserving sensory fidelity. This mechanism may have the benefit of leaving intact learning updates in sensory systems as a function of recently experienced sensory stimuli. Together, These results provide further support for the mechanisms of arousal-mediated adaptive gain control theory (91), indicating that some aspects of inattentive behavior might be indeed rational because the brain must operate under limited capacity constraints.

Additionally, we found that arousal systems carry reward expectancy information about specific visual cues that span the whole sensory space. An important implication of such neurocomputational signatures could be that agents track the utility distribution and volatility of the environment so that they can more accurately modulate prediction error signals. Interestingly, Recent work has shown that dopaminergic responses are amplified not only by the rarity of a reward received in a trial but also by its size (80). Thus, bottom-up noradrenergic reward expectation signals might be combined with top-down dopaminergic learning signals to efficiently guide reallocation of attentional resources in sensory systems. Thus, our computational modelling approach and behavioral paradigm implemented in rodents open the way to detailed investigations of the mechanisms underlying tight and essential interactions between arousal and dopaminergic systems.

Rodents have become an important model system in the study of decision behavior (44, 92–95). Here, we show that these organisms might be key to gaining a deeper understanding of the neurobiology underlying decision-making theories, which currently have a large impact in other disciplines such as medicine and economics. For instance, processes derived from rational inattention theories appear to be essential in guiding policy-making in both microeconomics and macroeconomic settings (96). In other fields, recent investigations have developed theories that attempt to provide normative accounts of complex neuropsychiatric conditions such as autism and schizophrenia, which have been characterized by deficits in performing optimal inference (97). However, these theories generally ignore the normative foundation that organisms must optimize behavioral processes in light of biological restrictions on information processing (98). Thus, the growing battery of molecular and imaging tools that is becoming available for use in rodents will enable a deeper un-

derstanding of the neurobiological underpinnings of limited cognition and apparently irrational decision behavior (45–47, 99). Thus, the corroboration of our theory using mice as a model organism opens the door to new directions that might be instrumental in the refinement and translation of these theories to applied settings in medicine, economics, and related social sciences.

## Methods

**Animal subjects.** All animal experiments were performed in accordance with the Animal Welfare Ordinance (TSchV 455.1) of the Swiss Federal Food Safety and Veterinary Office, and approved by the Zurich Cantonal Veterinary Office. Subjects were adult (at least 8 weeks old) C57BL/6 mice (6 males, 1 female). Mice were kept on a reversed 12h/12h light-dark cycle, and all experiments were performed during the dark phase. For implantation of head plates, mice were anesthetized with isoflurane and placed into a stereotaxic frame (Kopf instruments). A custom printed headplate (Protolabs Inc) was fitted to ensure that the head was held at a natural angle in the behavioral apparatus. Before the experiments, the mice were allowed to recover from the surgery for at least 10 days.

**Behavioral setup and tasks.** The specifics of the behavioural setup, as well as most of the parts used to construct it, are very similar to those developed in previous work (48), and widely adopted by the International Brain Laboratory (100).

The headfixed mice were trained to look at two gratings presented on the screen and pick the one that is more vertically oriented by turning the wheel with their fore-paws, which was coupled to the position of the two stimuli (Figure 2B).

Following recovery from surgery, the animals were put on a food restriction schedule (not dropping below 85% of initial weight). At the end of each training session the animals were weighted and additional amount of food was provided, dependent on the percentage of initial weight. For three days the animals were habituated to being headfixed and handled by the experimenter, with milkshake being delivered in random intervals during increasing periods of head-fixation. Then, mice were trained on the initial task, in which only a single stimulus appeared on either left or right side of the screen, which they had to move to the center of the screen (response location), in order to obtain a milkshake reward. After they mastered the simple selection task, the second grating was introduced (more horizontal/distractor), initially at low contrast, but progressively increasing contrast across sessions as the animal learned. After the second grating was completely introduced (contrast = 1) and session performance was above 60%, we started varying the contrasts of the two gratings independently across 3 levels (0.3, 0.6 and 1). Importantly, during the entire training procedure, we kept the orientation stimuli  $\theta$  were drawn from the prior distribution  $\pi(\theta)$  (see main text and Figure 1A). Once the animals reached good performance on the task (>60% across difficulties), we introduced different mappings of reward to orientation ( $\Omega$ ). In each of these mappings the reward size obtained for correctly picking the more vertical orientation was dependent on that orientation. We then ran each animal in each of the reward environments for at least 20 sessions. Here we studied adaptation to particular environment  $\Omega$  after 7 sessions of experience. Considering longer adaptation periods does not affect the main conclusions of our work.

To keep the volumes of milkshake constant the opening times of click valves (NResearch 161K011) were calibrated, before each day of training, to deliver a constant volume of milkshake. This was achieved by opening the valves repeatedly for different durations and subsequently fitting a curve, describing the relation between opening time and ml of delivered milkshake. Milkshake amounts in  $\mu\text{L}$  were mapped to the correct-side angle, dependent on the reward mapping environment  $\Omega$ . In the  $\Omega_{R:h \nearrow v}$  environment, the reward mapping was a linear increase from horizontal (0 deg, 1  $\mu\text{L}$ ) to vertical (90 deg, 8  $\mu\text{L}$ ). The reward mapping for the  $\Omega_{R:h \searrow v}$  environments was exactly the opposite, with horizontal grating yielding 8  $\mu\text{L}$  and vertical 1  $\mu\text{L}$ . In the  $\Omega_{R:h \rightleftharpoons v}$  environment all angles yielded 5  $\mu\text{L}$ . The illustration of the reward mappings for each environment  $\Omega$  is shown in Figure 1E, and the exact amounts are shown in Supplementary Table 1.

The stimuli were Gabor patches each spanning 15 visual degrees and with the phase of the grating randomised between trials. Decision was considered made when one of the gratings was brought to the middle of the screen. Correct choice yielded a drop of strawberry milkshake, and incorrect led to white noise being played for 0.5s and a 2s timeout before next trial (in addition to the ITI of 1.5 – 2.5 sec). To counteract bias, where animal might be content with just turning the wheel one way and getting 50% of rewards, incorrect trials were repeated (correct side was kept the same, but orientations resampled), but data from these trials were not used in the final analysis. To check that this did not influence the results, two animals were successfully trained also without repeating incorrect trials. For all experimental conditions, the orientations of the two gratings were picked from a manually set prior distribution of orientations (Figure 1A), with the difference between the two ranging from 20 to 90 degrees, in increments of 10. In a small percentage of trials, the two orientations were the same, in which case a random side choice delivered reward. For half a second after stimulus presentation the stimulus position was not coupled to wheel rotation, but the animal was not punished for turning it at this time (Figure 1C). Signal tone (12kHz), played for 0.2s cued the end of wheel-uncoupled phase and the animal could make the response.

**Pupil size analysis.** In order to track the pupil and licking, we filmed the animal from the side, illuminated by infrared light, using the FLIR Blackfly® camera. Pupil edges and licking responses were extracted using DeepLabCut (101) and eye diameter was calculated from the obtained videos. Trials were synced to video using a small white square in the corner of the screen that appeared at stimulus onset. The area of the pupil was calculated from the points tracked by DeepLabCut, and the trace for each daily session was low-pass filtered with a cutoff frequency of 20Hz to remove noise. Pupil size was then z-scored within session. Pupil size was binned into 0.2 second bins, with the binning window moving by 0.1 second, further smoothing the data. All multiple linear regressions studied here were ran on binned time-points with pupil size as dependent variable. Factors in the regression

included: absolute angle difference, contrast sum, reaction time, correct side orientation, correctness on a trial, correctness on the previous trial and binned licking. Furthermore, we split the data into correct and incorrect trials, and ran the same regression, but excluding the trial correctness parameter. We also measured phasic pupil responses by subtracting the baseline 0.5 seconds before stimulus onset from each trial pupil size. To investigate the arousal responses based on reward expectancy, we ran a bin-time regression to predict the phasic pupil response, same as for the non-baseline corrected data.

**Descriptive behavioral models.** Here we studied three descriptive models, each with different levels of complexity, which allowed us to evaluate basic behavioral signatures in all three different reward mapping conditions. This family of models do not explicitly use information about the statistics of the environment and condition-dependent behavioral goals.

On each trial, mice face two alternatives  $l$  and  $r$  with corresponding orientations  $\theta_l$  and  $\theta_r$ , which are shown on the left and right side of the screen, respectively (Figure 1B). The goal of the mice in all three stimulus-reward environments  $\Omega$  is to select the alternative that is closer to 90°. In the description of all models (unless otherwise specified), we assume that the orientations are mapped to an abstract "verticality" space from 0° to 90° (e.g.,  $\theta = 170^\circ$  is mapped to  $\theta = 10^\circ$ ). In descriptive model 1 (DM1), the probability of choosing alternative  $l$  in trial  $n$  is given by

$$P_n(\text{choose } l | \theta_l, \theta_r) = \Phi\left(\frac{\theta_l - \theta_r}{\sigma\sqrt{2}} + \beta_0 + \beta_1 D_{n-1}\right) (1 - \lambda) + \frac{\lambda}{2}, \quad (3)$$

where  $\Phi()$  is the normal cumulative density function,  $\sigma$  represents the degree of sensory noise in the representation of  $\theta$  (which in DM1 model is fixed for all orientations),  $\beta_0$  captures potential side biases,  $\beta_1$  captures biases caused by the decision  $D$  in the last trial ( $n - 1$ ), and  $\lambda$  captures potential lapse rates (in order to simplify notation, in the remainder of the model descriptions we will drop the trial indexes  $n$ ).

In descriptive model 2 (DM2), we studied the possibility that different levels of contrast are associated to different levels of sensory noise. Therefore, DM2 is given by

$$P(\text{choose } l | \theta_l, \theta_r) = \Phi\left(\frac{\theta_l - \theta_r}{\sqrt{\sigma(c_l)^2 + \sigma(c_r)^2}} + \beta_0 + \beta_1 D\right) (1 - \lambda) + \frac{\lambda}{2}, \quad (4)$$

where in this case the noise level of each alternative is a function of contrast  $c$ . In this model we fit three different noise levels for the different levels of contrast used in this study.

Finally, in descriptive model 3 (DM3), we investigated the possibility of "risk seeking/aversion" depending on the level of sensory uncertainty of each alternative induced by the dif-



ferent levels of contrast.

$$P(\text{choose } l | \theta_l, \theta_r) = \Phi \left( \frac{\theta_l - \theta_r}{\sqrt{\sigma(c_l)^2 + \sigma(c_r)^2}} + \beta_0 + \beta_1 D + \beta_2 (c_l - c_r) \right) (1 - \lambda) + \frac{\lambda}{2}, \quad (5)$$

where in this case  $\beta_2$  determines the strength of "risk seeking/aversion" (with negative values corresponding to apparent "risk aversion").

**Rational inattention model.** We studied the possibility that mice behave according to the rules of optimal statistical inference in estimating the orientation of each choice alternative. Crucially, here we take into consideration the fact that organisms have limited capacity to process information, and therefore, neural systems must allocate these limited resources according to each reward-mapping context in order to maximize the amount of reward consumed over the course of many trials and days.

We assumed that for a given input  $\theta_0$  the mouse makes an internal measurement  $m(\theta_0)$  which is corrupted by sensory noise. Crucially, the level of sensory noise will depend on how many resources the system dedicates to the measured orientation (described in detail below). Each time orientation  $\theta_0$  is presented to the observer, it results in different measurements  $m_i$  described with a conditional probability function  $p(m_i | \theta)$ . On each trial  $i$ , the observer computes a posterior distribution  $p(\theta | m_i)$  by combining the physical environmental prior distribution  $\pi(\theta)$  with the likelihood of the measurement  $p(m_i | \theta)$ . Then the mouse applies a decoding rule in order to obtain a posterior estimate  $\hat{\theta}(m(\theta))$ . Here we assume that mice compute the expected value of the posterior distribution:  $E[p(\theta | m)]$ . We assume that on each trial, the mouse independently estimates  $\hat{\theta}_l$  and  $\hat{\theta}_r$  for the input orientations  $\theta_l$  and  $\theta_r$ , respectively.

The measurement  $m$  follows a von Mises distribution

$$p(m | \theta) \propto e^{k(c)g(\theta)\cos(\theta-m)}, \quad (6)$$

where the precision of the measurement is determined by two multiplicative factors: (1)  $k(c)$  which is function of the contrast level for a given orientation in a particular trial (see Eq. 7 below), and (2)  $g(\theta)$ , a limited-resource gain function. Here  $g$  acts as a gain control mechanism that regulates how many resources the system allocates to a particular segment of the orientation space.

Activity of visual neurons as a function of contrast has been well described by the following function

$$k(c) = \frac{k_{\max} c^q}{c^q + c_{50}^q}, \quad (7)$$

where  $k_{\max}$  is the maximum activity of the neurons, and  $q$  and  $c_{50}$  specify the slope and semi-saturation point of the contrast response function (102). Given that the variability

of cortical neurons approximates a Poisson distribution, one can assume that the relative variability in the measurement  $\sigma(c)$  decreases in inverse proportion to the square-root of the cortical activity. Because the precision in the von Mises distribution can be defined as  $k = 1/\sigma^2$ , neural precision as a function of contrast can be described by equation 7.

If we constrain  $g(\theta) > 0$  for all  $\theta$  and to be a normalized function (we formally explain how  $g$  is estimated below), and assume a cost function  $K$  that provides information about the metabolic resources employed to encode visual information, one can formulate an optimization problem in order to find the optimal allocation of resources in the orientation space for: (i) a given physical environmental prior  $\pi(\theta)$ , (ii) a given contrast response function  $k(c)$ , (iii) reward outcomes associated to decision-outcome rules in a given context or environment  $\Omega$ , and (iv) downstream noise  $\sigma_{\text{late}}$  that is not related to sensory encoding. Formally, the goal is to find a resource allocation  $g^*$ , and the maximum allowed activity  $k_{\max}$  (with an underlying contrast response function, Eq. 7) such that

$$\max_{g, k_{\max}} \mathbb{E}[\text{reward} | \Omega, k(c), \sigma_{\text{late}}] - K(\bar{k}, \eta),$$

where  $\mathbf{c}$  is the set of contrasts that the animal experiences. We model the metabolic cost  $K$  as a linear function of the average precision  $\bar{k}$  that the agent invests on solving the inference problem, thus  $K(\bar{k}, \eta) \equiv \eta * \bar{k}$ , where  $\eta > 0$  indicates how much the metabolic cost scales with average precision  $\bar{k}$  defined as

$$\bar{k} = \int_{\mathbf{c}} \int_{\theta} \pi(\theta) g(\theta) k(c) d\theta dc. \quad (8)$$

We could have also considered more complex non-linear relationships between metabolic costs and neural activity. However, the main conclusions of our work are not affected by the exact specification of the cost function, and it has been demonstrated that the linear relationship is a reasonable assumption (59). We also note that we have not included costs associated to downstream precision  $1/\sigma_{\text{late}}$ . However, if we assume that  $\sigma_{\text{late}}$  influences choices (and therefore reward expectation in 2), including such cost in  $K$  as an additive factor does affect the estimation of the optimal allocation of resources  $g$ .

Here we do not employ information transmission as optimization criteria as classically assumed in the rational inattention literature, which is defined as follows:

$$K = \eta I(\theta; m), \quad (9)$$

where  $I(\theta; m)$  denotes the mutual information, which measures the expected reduction in uncertainty after observing a signal  $m$

$$I(\theta; m) = H(\theta) - \mathbb{E}[H(\theta | m)], \quad (10)$$

where  $H(\theta)$  denotes the entropy of the prior distribution  $\pi(\theta)$  and the second term measures the expected reduction in uncertainty after observing the signal. While this cost function

has several benefits (such as mathematical tractability for relatively simple problems), it also has been pointed out that specifying attention costs to be linear in entropy reduction might be problematic in particular when applied in problems of sensory perception (43). In any event, for the case of sensory perception, and in our experimental paradigm, we argue that it is more appropriate to assign costs to the amount of energy invested in generating neural activity as defined above. Nevertheless, we show that the two costs functions generate similar qualitative predictions in the resource allocation function  $g$  (Figure S3), and also study the relationship between expected precision and expected uncertainty reduction (Figure S4).

The next step is to specify the optimization problem. For instance, in the "constant reward for correct decisions" condition (i.e., environment  $\Omega_{R:h \Rightarrow v}$ ), the agent aims at minimizing the expected probability of errors plus its associated metabolic costs

$$\frac{1}{IJ} \sum_{i=c_l}^I \sum_{j=c_r}^J \iint_{\theta} P(\text{error}|\theta_{l,i}, \theta_{r,j}) \pi(\theta_l) \pi(\theta_r) d\theta_l d\theta_r + K(\bar{k}, \eta), \quad (11)$$

where indexes  $i$  and  $j$  reflect the the different levels of contrast (three in our experiments) applied to the left and right orientation inputs, respectively. Here, we still need to define the probability of making an erroneous response  $P(\text{error})$ . In our observer model, a source of decision errors is caused by variability in the estimates  $\hat{\theta}(m)$  due to measurement errors  $m$ , thus resulting in a resulting in a conditional probability of estimated orientation given the true stimulus orientation  $p(\hat{\theta}(m)|\theta_0)$  (in order to simplify notation, we leave occasionally the dependence on  $m$ ). Here, we assume that the distribution of estimators  $p(\hat{\theta}(m)|\theta_0)$  is Gaussian and therefore it will be convenient to compute its expected value  $E[\hat{\theta}(m)|\theta_0]$  and variance  $\text{Var}[\hat{\theta}(m)|\theta_0]$ , which are given by

$$E[\hat{\theta}(m)|\theta_0] = \text{atan2}(a, b) \quad (12)$$

and

$$\text{Var}[\hat{\theta}(m)|\theta_0] = -2 \log \left( \sqrt{a^2 + b^2} \right) \quad (13)$$

respectively, with

$$a \equiv \int \sin(\hat{\theta}(m)) p(m|\theta_0) dm \quad (14)$$

and

$$b \equiv \int \cos(\hat{\theta}(m)) p(m|\theta_0) dm. \quad (15)$$

As in the descriptive models, here we assume that the orientation estimations are mapped to a "verticality" space, and therefore the probability that the mouse selects  $\theta_l$  is given by

$$P(\text{choose } l|\theta_l, \theta_r) = \Phi \left( \frac{E[\hat{\theta}_l|\theta_l] - E[\hat{\theta}_r|\theta_r]}{\sqrt{\text{Var}[\hat{\theta}_l|\theta_l] + \text{Var}[\hat{\theta}_r|\theta_r]}} \right). \quad (16)$$

In addition to sensory precision in the coding of orientation  $k(c)g(\theta)$  (see Eq. 1), we also account for late noise in the decision stage (that is, post-decoding noise), which may capture any unspecific forms of downstream noise occurring during the response process that are unrelated to the estimation of orientation per se. We assume this late noise to be unbiased and Gaussian distributed  $N(0, \sigma_{\text{late}}^2)$ ; therefore, it can be easily added to our model as follows

$$P(\text{choose } l|\theta_l, \theta_r) = \Phi \left( \frac{E[\hat{\theta}_l|\theta_l] - E[\hat{\theta}_r|\theta_r]}{\sqrt{\text{Var}[\hat{\theta}_l|\theta_l] + \text{Var}[\hat{\theta}_r|\theta_r] + \sigma_{\text{late}}^2}} \right). \quad (17)$$

Hence, the probability of an erroneous decision  $P(\text{error})$  in Eq. 11 can be defined as follows:

$$P(\text{error}|\theta_l, \theta_r) = \Phi \left( \frac{-|E[\hat{\theta}_l|\theta_l] - E[\hat{\theta}_r|\theta_r]|}{\sqrt{\text{Var}[\hat{\theta}_l|\theta_l] + \text{Var}[\hat{\theta}_r|\theta_r] + \sigma_{\text{late}}^2}} \right). \quad (18)$$

With these definitions, we can formulate the optimization problem for the remaining reward mapping conditions. For the environment  $\Omega$  in which the amount of received reward  $R$  for correct responses is linearly mapped to the degree of "verticality" where horizontal ( $h$ ) orientations are mapped to the smallest reward and vertical ( $v$ ) orientations are mapped to the highest reward (environment denoted  $\Omega_{R:h \nearrow v}$ ), and receive no reward for incorrect responses, the goal is to find the allocation of resources that minimizes the following expression

$$\frac{1}{IJ} \sum_{i=c_l}^I \sum_{j=c_r}^J \iint_{\theta} \max(R(\theta_l), R(\theta_r)) \times P(\text{error}|\theta_{l,i}, \theta_{r,j}) \pi(\theta_l) \pi(\theta_r) d\theta_l d\theta_r + K(\bar{k}, \eta). \quad (19)$$

For the environment  $\Omega$  in which the amount of received reward  $R$  for correct responses is linearly mapped to the degree of "verticality" where horizontal ( $h$ ) orientations are mapped to the highest reward and vertical ( $v$ ) orientations are mapped to the smallest reward (environment denoted  $\Omega_{R:h \searrow v}$ ), and receive no reward for incorrect responses, the goal is to find the resource the resource allocation function  $g(\theta)$  that minimizes the following expression

$$\frac{1}{IJ} \sum_{i=c_l}^I \sum_{j=c_r}^J \iint_{\theta} \min(R(\theta_l), R(\theta_r)) \times P(\text{error}|\theta_{l,i}, \theta_{r,j}) \pi(\theta_l) \pi(\theta_r) d\theta_l d\theta_r + K(\bar{k}, \eta). \quad (20)$$

Recall that in all cases the decision rule is to choose the orientation that is more vertical. Therefore, in the  $\Omega_{R:h \searrow v}$  environment we are actually asking the mice to choose the orientation that is mapped to the smallest reward, however, in this

environment choosing the smallest orientation on any given trial is actually the decision that guarantees reward receipt.

The next step is to describe a methodology that allowed us to find potential solutions in our resource allocation problem. Our approach is to estimate the minimum achievable reward loss (plus costs) in a given environment  $\Omega$ , by finding the minimum achievable value over a flexible parametric family of possible functions  $g(\theta)$ , with the following properties

$$\int g(\theta) d\theta = 1, \quad \frac{dG}{d\theta} > 0. \quad (21)$$

Here we assume a finite-order polynomial function  $G(\theta)$  consistent with the property that  $g(\theta) = G(\theta)'$ . This requires  $G(0) = 0$  and  $G(1) = 1$ , and therefore  $G(\theta)$  can be written in the form:

$$G(\theta) = \theta [1 + (\theta - 1)(g_0 + g_1\theta + \dots + g_p\theta^p)], \quad (22)$$

with the properties described in Eq. 21, where  $\mathbf{g}_p = \{g_0, \dots, g_p\}$  is a set of parameters over which we optimize. Note that for a large enough value of  $p$ , any smooth function can be well approximated by a member of this family. Also note that for the case  $g = 0, \dots, g_p = 0$ , the resource allocation problem is given by a rule that assigns equal amount of resources to all orientations  $\theta$ .

In this study we use a parameter vector  $\mathbf{g}_p$  of order  $p = 2$  (we found that using higher order did not significantly improved the optimal solutions). Given the symmetry of the prior distribution relative to  $\theta = \pi$ , we estimate an initial  $\tilde{g}(\theta)$  for the space  $\theta \in [0, \pi]$  and then defined  $g(\theta) = \tilde{g}(\theta) \oplus \text{flip}(\tilde{g}(\theta))$ , where the operator  $\oplus$  denotes concatenation and the operator  $\text{flip}()$  denotes vector reversal.

**Rational inattention model predictions.** We used the empirical distribution and input stimuli as well as the distribution of rewards (i.e., drops of milkshake) used in our experiments in order to derive predictions of the resource allocation function  $g(\theta)$ , the maximum activity allowed activity  $k_{\max}$ , that minimized reward loss (plus its associated sensory precision cost  $K$ ). Given that we were interested in studying how resource allocation is potentially influenced by different levels of down-stream noise  $\sigma_{\text{late}}$ , we found the optimal parameter vector  $\mathbf{g}_p$  and  $k_{\max}$  for different combinations of  $\eta$  and  $\sigma_{\text{late}}$  (Figure 2 and Figures S2,3).

**Applying the rational inattention model to empirical data.** In order to fit the inference model to the empirical data in a way that was comparable to the full descriptive model (DM3, see above) we used

$$P(\text{choose } l | \theta_l, \theta_r) = \Phi(z), \quad (23)$$

with

$$z = \frac{E[\hat{\theta}_l | \theta_l] - E[\hat{\theta}_r | \theta_r]}{\sqrt{\text{Var}[\hat{\theta}_l | \theta_l] + \text{Var}[\hat{\theta}_r | \theta_r] + \sigma_{\text{late}}^2}} + \beta_0 + \beta_1 D + \beta_2 (c_l - c_r). \quad (24)$$

For all models, we are interested in finding the set of parameters  $\beta$ ,  $c^q$ ,  $c_{50}^q$  and  $\sigma_{\text{late}}$ . For the endogenous model, we were in addition interested in finding  $\eta$ . For the exogenous model, we also found  $\mathbf{g}$  and  $k_{\max}$ . Notably, the endogenous model has the same number of parameters as the most complex descriptive model (DM3). Additionally, note that we dropped the lapse rate parameter  $\lambda$  from the rational inattention model. We reasoned that the rational inattention model rationalizes the apparent lapse rates that emerge in the descriptive models. In fact, including  $\lambda$  as a parameter in our model led to an estimated valued  $\lambda \approx 0$  for all mice, thus confirming our intuition.

In order study whether the reallocation of limited resources is necessary to explain the data, we also considered a model where  $\mathbf{g} = \{0, 0, 0\}$ , which corresponds to a model where mice allocate their resources equally across the whole sensory space.

**Learning model.** We investigated whether a reinforcement learning (RL) model that incorporates the same coding constraints of the ideal observer model would generate similar performance. That is, in the learning model we do not directly find the parameters  $\mathbf{g}$  of the gain coding function  $g(\theta)$ , but this function is continuously updated based on trial-to-trial experience via RL (Figure 3A).

Assume that in any given trial at time  $t$  a mouse chooses alternative  $\tilde{\theta}$ . After this decision, the mouse receives reward  $R_t$  that depends on the chosen option  $\tilde{\theta}$  according to decision-outcome rules of environment  $\Omega$  (Figure 1C). In addition, here we assume that mice evaluate their degree of confidence  $C_t$  based on the decision in trial  $t$ . Here, we define confidence based on the statistical definition of confidence (103), that is, the probability that the chosen option is correct given the chosen option:  $C_t = p(\text{correct} | \tilde{\theta})$ . Information about  $R_t$  and  $C_t$  is then used to update a reward distribution vector  $\hat{R}(\theta)$  (mapping orientation stimuli to reward) using the reinforcement learning rule

$$\hat{R}_t = \hat{R}_{t-1} + \alpha_t \cdot \delta_t, \quad (25)$$

where,  $\alpha$  is defined as the learning rate, which can take one of two values that depend on positive and negative prediction errors

$$\alpha_t = \begin{cases} C_t / (C_t + \tilde{\alpha}^-) & \text{if } \delta_t \leq 0 \\ C_t / (C_t + \tilde{\alpha}^+) & \text{if } \delta_t > 0, \end{cases} \quad (26)$$

with  $\tilde{\alpha} \geq 0$ . This implies that if  $\tilde{\alpha} \rightarrow 0$ , then the learning rate  $\alpha \rightarrow 1$  and confidence  $C_t$  have little influence. On the other hand if  $\tilde{\alpha} > 0$  then confidence starts to have more influence in the learning rate, with higher values of confidence having a stronger influence in the update rule. We define the prediction error vector

$$\delta_t = R_t - \hat{R}_t(\tilde{\theta}) \cdot e^{\tilde{k} \cdot \cos((\tilde{\theta} - \theta) - 1)}. \quad (27)$$

This definition implies that the reward distribution vector  $\hat{R}$  is updated according to the location of the chosen stimulus  $\tilde{\theta}$  smoothed by parameter  $\tilde{k}$ , and modulated by learning rate

$\alpha_t$ . Finally, the reward distribution  $\hat{R}$  is transformed to the gain function  $g$  via a normalization operation

$$g_{t+1} \leftarrow \frac{\hat{R}_{i,t}}{\sum_i \hat{R}_t}. \quad (28)$$

Hence, this RL model has only three free parameters that are fitted to the observed data:  $\tilde{\alpha}^+$ ,  $\tilde{\alpha}^-$ , and  $\tilde{k}$ . Vector  $\hat{R}_t$  was discretized in steps of  $2^\circ$  from  $0^\circ$  to  $178^\circ$  in the orientation space.

**Model fits.** For a given model  $M$ , we denote its set of parameters by a vector  $\Psi$ . The goal is to find the combination  $\Psi$  that maximized the probability of all of a single subject's responses given the presented stimuli and the parameters. In this case, the log of the parameter likelihood function is

$$LL(\Psi; M) = \log p(\text{data} \mid \Psi, \text{model}) \quad (29)$$

$$= \log \prod_{i=1}^{N_{\text{trial}}} p(D_i \mid \theta_{n,l}, \theta_{n,r}, c_{n,l}, c_{n,r}, \Psi) \quad (30)$$

$$= \sum_n^{N_{\text{trials}}} \log p(D_i \mid \theta_{n,l}, \theta_{n,r}, c_{n,l}, c_{n,r}, \Psi), \quad (31)$$

where  $\theta$  and  $c$  are the orientation and contrast inputs for the left ( $l$ ) and right ( $r$ ) alternative, respectively, and  $D_i$  is the mouse's response on trial  $i$ . The implementation of the likelihood function was implemented using the `mle2` function in the `bbmle` library (104) implemented in the software package R (105). We typically performed an initial stage with 2,000 randomly chosen initial parameter combinations. For each model  $M$ , we repeated this procedure three times, leading to log likelihood values that were typically within one point. We are therefore reasonably confident that we found the global maxima for each model. As model comparison method, we use the Akaike information criterion (AIC) (106).

**Poisson neural model.** We investigated if a more biologically relevant model of V1 function would also be able to capture characteristics of the rational inattention codes observed in the algorithmic model. An advantage of this implementational approach is that we can relate the metabolic cost directly to the expected number of spikes that the system generates to solve the decision problem.

The neural population consisted of Poisson neurons, each generating spikes  $r$  independently for a given input stimulus  $\theta$  with probability

$$p(r|\theta) = \frac{e^{-f(\theta)} f(\theta)^r}{r!}, \quad (32)$$

The tuning functions  $f$  of the neurons follow a bell-shaped activation pattern of the form

$$f_n(\theta) = g(\theta_i) k(c) \exp(\hat{k}(\cos(\theta_i - \theta) - 1)) + \Delta, \quad (33)$$

where  $g()$  is a multiplicative gain partially determining the distribution of coding resources through the orientation

space,  $k(c)$  is the multiplicative gain that determines firing rate as a function of contrast,  $\theta_i$  is the preferred orientation of neuron  $i$ , and  $\Delta$  the base firing rate of a neuron at rest.  $\hat{k}$  controls the width of the tuning curve. The tuning curve width  $\hat{k}$  was estimated from the same study that we used to derive the prior distribution  $\pi(\theta)$  (47) (see Results section in main text and Figure S1).

Based on this specification, the log-likelihood function of population vector activity  $\vec{r}$  can be written as

$$\log[p(\vec{r}|\theta)] = \sum_n^N \log \frac{e^{-f_n(\theta)} f_n(\theta)^{r_n}}{r_n!}. \quad (34)$$

To derive a posterior estimate  $\hat{\theta}$ , we assumed the Bayesian least squares estimate (BLS). The BLS estimator can be approximated with discrete sums,

$$\hat{\theta}_{\text{BLS}}(\vec{r}) \approx \frac{\sum_n \theta_n p(\vec{r}|\theta_n) p(\theta_n) \delta_n}{\sum_n p(\vec{r}|\theta_n) p(\theta_n) \delta_n}, \quad (35)$$

in which  $\theta_n$  is a discrete set of stimulus values and  $\delta_n$  is the spacing between adjacent values. When  $\theta_n$  (the preferred stimuli of the neurons), are distributed in the stimulus space proportional to the prior distribution  $\theta_i$ , then  $\delta_n \propto \frac{1}{p(\theta_n)}$  (60, 71), thus, the BLS estimator can be written as

$$\begin{aligned} \hat{\theta}_{\text{BLS}}(\vec{r}) &\approx \frac{\sum_n \theta_n p(\vec{r}|\theta_n)}{\sum_n p(\vec{r}|\theta_n)} \\ &\approx \frac{\sum_n \theta_n \exp(\sum_m^M r_m \log f_m(\theta_n) - \sum_m^M f_m(\theta_n) - \sum_m^M \log(r_m!))}{\sum_n \exp(\sum_m^M r_m \log f_m(\theta_n) - \sum_m^M f_m(\theta_n) - \sum_m^M \log(r_m!))} \\ &= \frac{\sum_n \theta_n \exp(\sum_m^M r_m \log f_m(\theta_n) - \sum_m^M f_m(\theta_n))}{\sum_n \exp(\sum_m^M r_m \log f_m(\theta_n) - \sum_m^M f_m(\theta_n))}, \end{aligned}$$

where in the last step, the last sum inside the exponential does not depend on the stimulus and can be dropped from the numerator and denominator.

Applying this model to our decision task, we assume that for two inputs  $\theta_l$  and  $\theta_r$  in any given trial, the model generates population activity  $\vec{r}_l$  and  $\vec{r}_r$  independently for each input, which leads to the computation of estimates  $\hat{\theta}_l$  and  $\hat{\theta}_r$ . Then a choice is made based on the decision rule of our task.

The goal of the neural network to find a balance between model performance (i.e., reward intake) and the metabolic costs associated to neural activity in the network. More formally we need to find the optimal resource allocation  $g$  and a maximum activity  $r_{\text{max}}$  such that

$$\max_{g, k_{\text{max}}} \mathbb{E}[\text{reward} \mid \Omega, k(\mathbf{c}), \sigma_{\text{late}}, \pi(\theta)] - \eta \mathbb{E}[\text{spikes}], \quad (36)$$

where in this case  $\eta$  corresponds to unit cost per spike generated by the network.

#### ACKNOWLEDGEMENTS

We thank Anne Urai for valuable discussions during the setup of the mice experiments. We would also like to thank Peter D'Almeida and Tom Christen for assistance with animal training. This work was supported by a European Research

Council (ERC) starting grant (ENTRAINER) to R.P. This project has received funding from the European Research Council (ERC) under the European Union's Horizon 2020 research and innovation programme (grant agreement No. 758604), and ETH Zurich (D.B.).

#### AUTHOR CONTRIBUTIONS

N.G. built the experimental setups, piloted the development and coding of the experimental paradigm, performed all surgeries, trained the animals, and carried out data analyses. J.B. contributed to the experimental code, trained the animals, and implemented computational models. R.P. conceived the original idea of the study, and contributed to data analyses. All authors contributed to conceptual development of the experimental paradigm, discussed the results and wrote the paper. D.B. and R.P. raised funding and jointly supervised the study.

## Bibliography

1. Dobromir Rahnev and Rachel N. Denison. Suboptimality in perceptual decision making. *Behavioral and Brain Sciences*, 41:e223, feb 2018. ISSN 0140-525X. doi: 10.1017/S0140525X18000936.
2. Justin L. Gardner. Optimality and heuristics in perceptual neuroscience. *Nature Neuroscience*, page 1, feb 2019. ISSN 1097-6256. doi: 10.1038/s41593-019-0340-4.
3. Frederike H. Petzschner, Lilian A.E. Weber, Tim Gard, and Klaas E. Stephan. Computational Psychosomatics and Computational Psychiatry: Toward a Joint Framework for Differential Diagnosis, sep 2017. ISSN 18732402.
4. Emir Kamenica. Bayesian Persuasion and Information Design. *Annual Review of Economics*, 11(1):249–272, aug 2019. ISSN 1941-1383. doi: 10.1146/annurev-economics-080218-025739.
5. Marco Del Negro. Bayesian Macroeconometrics. In *The Oxford Handbook of Bayesian Econometrics*. Oxford University Press, nov 2012. ISBN 9780191743504. doi: 10.1093/oxfordhb/9780199559084.013.0008.
6. Jeremy E. Niven and Simon B. Laughlin. Energy limitation as a selective pressure on the evolution of sensory systems, jun 2008. ISSN 00220949.
7. Alfonso Renart and Christian K. Machens. Variability in neural activity and behavior, apr 2014. ISSN 18736882.
8. Valentin Wyart and Etienne Kochlin. Choice variability and suboptimality in uncertain environments, oct 2016. ISSN 23521546.
9. Michael Woodford. Modeling Imprecision in Perception, Valuation, and Choice. *Annual Review of Economics*, 12(1), aug 2020. ISSN 1941-1383. doi: 10.1146/annurev-economics-102819-040518.
10. Wei Ji Ma, Jeffrey M Beck, Peter E Latham, and Alexandre Pouget. Bayesian inference with probabilistic population codes. *Nature neuroscience*, 9(11):1432–1438, nov 2006. ISSN 1097-6256. doi: 10.1038/nm11790.
11. Ahmad T Qamar, R James Cotton, Ryan G George, Jeffrey M Beck, Eugenia Prezhdo, Allison Laudano, Andreas S Tolia, and Wei Ji Ma. Trial-to-trial, uncertainty-based adjustment of decision boundaries in visual categorization. *Proceedings of the National Academy of Sciences*, 110(50):20332–20337, dec 2013. ISSN 0027-8424. doi: 10.1073/pnas.1219756110.
12. Konrad P Kording and Daniel M Wolpert. Bayesian integration in sensorimotor learning. *Nature*, 427(6971):244–247, jan 2004. ISSN 0028-0836. doi: 10.1038/nature02169.
13. Alan A Stocker and Eero P Simoncelli. Noise characteristics and prior expectations in human visual speed perception. *Nature Neuroscience*, 9(4):578–585, apr 2006. ISSN 10976256. doi: 10.1038/nm1669.
14. Edgar Y Walker, R James Cotton, Wei Ji Ma, and Andreas S Tolia. A neural basis of probabilistic computation in visual cortex. *Nature Neuroscience* 2019 23:1, 23(1):122–129, dec 2019. ISSN 1546-1726. doi: 10.1038/s41593-019-0554-5.
15. Han Hou, Qihao Zheng, Yuchen Zhao, Alexandre Pouget, and Yong Gu. Neural Correlates of Optimal Multisensory Decision Making under Time-Varying Reliabilities with an Invariant Linear Probabilistic Population Code. *Neuron*, 104(5):1010–1021.e10, dec 2019. ISSN 10974199. doi: 10.1016/j.neuron.2019.08.038.
16. Falk Lieder and Thomas L Griffiths. Decision-rational analysis: understanding human cognition as the optimal use of limited computational resources. *Behavioral and Brain Sciences*, pages 1–85, feb 2019. ISSN 0140-525X. doi: 10.1017/S0140525X1900061X.
17. Rahul Bhui, Lucy Lai, and Samuel J Gershman. Resource-rational decision making, oct 2021. ISSN 23521546.
18. Chris R Sims. Efficient coding explains the universal law of generalization in human perception. *Science (New York, N.Y.)*, 360(6389):652–656, may 2018. ISSN 1095-9203. doi: 10.1126/science.aag1118.
19. Xue-Xin Wei and Alan A Stocker. Lawful relation between perceptual bias and discriminability. *Proceedings of the National Academy of Sciences of the United States of America*, 114(38):10244–10249, sep 2017. ISSN 1091-6490. doi: 10.1073/pnas.1619153114.
20. Ronald van den Berg and Wei Ji Ma. A resource-rational theory of set size effects in human visual working memory. *eLife*, 7, aug 2018. ISSN 2050084X. doi: 10.7554/eLife.34963.
21. Chris R Sims, Robert A Jacobs, and David C Knill. An ideal observer analysis of visual working memory. *Psychological Review*, 119(4):807–830, 2012. ISSN 1939-1471. doi: 10.1037/a0029856.
22. Noga Zaslavsky, Charles Kemp, Terry Regier, and Naftali Tishby. Efficient compression in color naming and its evolution. *Proceedings of the National Academy of Sciences of the United States of America*, 115(31):7937–7942, jul 2018. ISSN 1091-6490. doi: 10.1073/pnas.1800521115.
23. Samuel J Gershman and Rahul Bhui. Rationally inattentive intertemporal choice. *Nature Communications*, 11(1):3365, dec 2020. ISSN 2041-1723. doi: 10.1038/s41467-020-16852-y.
24. Rahul Bhui and Samuel J Gershman. Decision by sampling implements efficient coding of psychoeconomic functions. *Psychological Review*, 125(6):985–1001, nov 2018. ISSN 1939-1471. doi: 10.1037/rev0000123.
25. Rafał Polania, Michael Woodford, and Christian C Ruff. Efficient coding of subjective value. *Nature Neuroscience*, 22(1):134–142, jan 2019. ISSN 1097-6256. doi: 10.1038/s41593-018-0292-0.
26. Xavier Gabaix, David Laibson, Guillermo Moloche, and Stephen Weinberg. Costly information acquisition: Experimental analysis of a boundedly rational model. *American Economic Review*, 96(4):1043–1068, sep 2006. ISSN 00028282. doi: 10.1257/aer.96.4.1043.
27. Christopher A Sims. Implications of rational inattention. *Journal of Monetary Economics*, 50(3):665–690, apr 2003. ISSN 03043932. doi: 10.1016/S0304-3932(03)00029-1.
28. Kenway Louie and Paul W Glimcher. Efficient coding and the neural representation of value. *Annals of the New York Academy of Sciences*, 1251:13–32, mar 2012. ISSN 1749-6632. doi: 10.1111/j.1749-6632.2012.06496.x.
29. Aldo Rustichini, Katherine E Conen, Xinying Cai, and Camillo Padoa-Schioppa. Optimal coding and neuronal adaptation in economic decisions. *Nature Communications*, 8(1):1208, dec 2017. ISSN 2041-1723. doi: 10.1038/s41467-017-01373-y.
30. Andrew Caplin and Mark Dean. Revealed preference, rational inattention, and costly information acquisition. *American Economic Review*, 105(7):2183–2203, jul 2015. ISSN 00028282. doi: 10.1257/aer.20140117.
31. Benjamin Hébert and Michael Woodford. Rational Inattention when Decisions Take Time. Technical report, National Bureau of Economic Research, Cambridge, MA, oct 2019.
32. Drew Fudenberg, Philipp Strack, and Tomasz Strzalecki. Speed, accuracy, and the optimal timing of choices, dec 2018. ISSN 19447981.
33. Jeffrey M Beck, Wei Ji Ma, Xaq Pitkow, Peter E Latham, and Alexandre Pouget. Not noisy, just wrong: the role of suboptimal inference in behavioral variability. *Neuron*, 74(1):30–39, apr 2012. ISSN 1097-4199. doi: 10.1016/j.neuron.2012.03.016.
34. Matteo Carandini and David J Heeger. Normalization as a canonical neural computation. *Nature reviews. Neuroscience*, 13(1):51–62, jan 2012. ISSN 1471-0048. doi: 10.1038/nrn3136.
35. Jeremy E Niven and Simon B Laughlin. Energy limitation as a selective pressure on the evolution of sensory systems, jun 2008. ISSN 00220949.
36. Mel Win Khaw, Ziang Li, and Michael Woodford. Cognitive Imprecision and Small-Stakes Risk Aversion. *The Review of Economic Studies*, aug 2020. ISSN 0034-6527. doi: 10.1093/restud/rdaa044.
37. Hang Zhang, Xiangjuan Ren, and Laurence T Maloney. The bounded rationality of probability distortion. *Proceedings of the National Academy of Sciences of the United States of America*, 117(36):22024–22034, sep 2020. ISSN 10916490. doi: 10.1073/pnas.1922401117.
38. Keno Juechems, Jan Balaguer, Bernhard Spitzer, and Christopher Summerfield. Optimal utility and probability functions for agents with finite computational precision. *Proceedings of the National Academy of Sciences*, 118(2):e2002232118, jan 2021. ISSN 0027-8424. doi: 10.1073/pnas.2002232118.
39. Cary Frydman and Lawrence J Jin. Efficient Coding and Risky Choice. *SSRN Electronic Journal*, nov 2018. ISSN 1556-5068. doi: 10.2139/ssrn.3270773.
40. Filip Matějka and Alisdair McKay. Rational inattention to discrete choices: A new foundation for the multinomial logit model. *American Economic Review*, 105(1):272–298, jan 2015. ISSN 00028282. doi: 10.1257/aer.20130047.
41. Arthur J Robson. The Biological Basis of Economic Behavior. *Journal of Economic Literature*, 39(1):11–33, mar 2001. ISSN 0022-0515. doi: 10.1257/jel.39.1.11.
42. Nick Netzer. Evolution of time preferences and attitudes toward risk. *American Economic Review*, 99(3):937–955, jun 2009. ISSN 00028282. doi: 10.1257/aer.99.3.937.
43. Michael Woodford. Prospect Theory as Efficient Perceptual Distortion. *American Economic Review*, 102(3):41–46, may 2012. ISSN 0002-8282. doi: 10.1257/aer.102.3.41.
44. Matteo Carandini and Anne K Churchland. Probing perceptual decisions in rodents, jul 2013. ISSN 10976256.
45. Oleg I Rummyantsev, Jérôme A Lecoq, Oscar Hernandez, Yanping Zhang, Joan Savall, Radosław Chrapkiewicz, Jane Li, Hongkui Zeng, Surya Ganguli, and Mark J Schnitzer. Fundamental bounds on the fidelity of sensory cortical coding. *Nature*, pages 1–6, mar 2020. ISSN 0028-0836. doi: 10.1038/s41586-020-2130-2.
46. Carsen Stringer, Marius Pachitariu, Nicholas Steinmetz, Matteo Carandini, and Kenneth D Harris. High-dimensional geometry of population responses in visual cortex. *Nature*, page 1, jun 2019. ISSN 0028-0836. doi: 10.1038/s41586-019-1346-5.
47. Carsen Stringer, Michalis Michaelos, Dmitri Tsybouski, Sarah E. Lindo, and Marius Pachitariu. High-precision coding in visual cortex. *Cell*, apr 2021. ISSN 00928674. doi: 10.1016/j.cell.2021.03.042.
48. Christopher P. Burgess, Armin Lak, Nicholas A. Steinmetz, Peter Zatlka-Haas, Charu Bai Reddy, Elina A.K. Jacobs, Jennifer F. Linden, Joseph J. Paton, Adam Ranson, Sylvia Schröder, Sofia Soares, Miles J. Wells, Lauren E. Wool, Kenneth D. Harris, and Matteo Carandini. High-Yield Methods for Accurate Two-Alternative Visual Psychophysics in Head-Fixed Mice. *Cell Reports*, 2017. ISSN 22111247. doi: 10.1016/j.celrep.2017.08.047.
49. Xue-Xin Wei and Alan A Stocker. A Bayesian observer model constrained by efficient coding can explain anti-Bayesian percepts. *Nature neuroscience*, 18(10):1509–1517, 2015.
50. Dmitry R Lyamzin, Ryo Aoki, Mohammad Abdolrahmani, and Andrea Benucci. Mice can learn a stimulus-invariant orientation discrimination task. *bioRxiv*, page 2020.12.20.423700, dec 2020. doi: 10.1101/2020.12.20.423700.
51. Anne E. Urai, Anke Braun, and Tobias H. Donner. Pupil-linked arousal is driven by decision uncertainty and alters serial choice bias. *Nature Communications*, 8, 2017. ISSN 20411723. doi: 10.1038/ncomms14637.
52. Rafał Polania, Ian Krajbich, Marcus Grueschow, and Christian C Ruff. Neural oscillations and synchronization differentially support evidence accumulation in perceptual and value-based decision-making. *Neuron*, 82(3):709–720, may 2014. ISSN 08966273. doi: 10.1016/j.neuron.2014.03.014.
53. Anne K Churchland, Roozbeh Kiani, and Michael N Shadlen. Decision-making with multiple alternatives. *Nature Neuroscience*, 11(6):693–702, jun 2008. ISSN 10976256. doi: 10.1038/nn.2123.
54. Aniek Schoups, Rufin Vogels, Ning Qian, and Guy Orban. Practising orientation identifi-

- cation improves orientation coding in V1 neurons. *Nature*, 412(6846):549–553, aug 2001. ISSN 00280836. doi: 10.1038/35087601.
55. Marshall G Shuler and Mark F Bear. Reward Timing in the Primary Visual Cortex. *Science*, 311(1)–11, 2006.
56. Jasper Poort, Adil G K Khan, Marius Pachitariu, Abdellatif Nemri, Ivana Orsolich, Julija Krupic, Marius Bauza, Maneesh Sahani, Georg B B Keller, Thomas D D Msrisc-Flogel, and Sonja B B Hofer. Learning Enhances Sensory and Multiple Non-sensory Representations in Primary Visual Cortex. *Neuron*, 86(6):1478–1490, jun 2015. ISSN 0896-6273. doi: 10.1016/j.neuron.2015.05.037.
57. Rajesh P N Rao and Dana H Ballard. Predictive coding in the visual cortex: A functional interpretation of some extra-classical receptive-field effects. *Nature Neuroscience*, 2(1):79–87, jan 1999. ISSN 10976256. doi: 10.1038/4580.
58. Hendrikje Nienborg and Bruce G Cumming. Decision-related activity in sensory neurons reflects more than a neuron's causal effect. *Nature*, 459(7243):89–92, may 2009. ISSN 0028-0836. doi: 10.1038/nature07821.
59. Kevin Mann, Stephane Dery, Surya Ganguli, and Thomas R. Clandinin. Coupling of activity, metabolism and behaviour across the *Drosophila* brain. *Nature*, pages 1–5, apr 2021. ISSN 0028-0836. doi: 10.1038/s41586-021-03497-0.
60. Deep Ganguli and Eero P Simoncelli. Efficient sensory encoding and Bayesian inference with heterogeneous neural populations. *Neural Computation*, 26(10):2103–2134, oct 2014. ISSN 1530-888X. doi: 10.1162/NECO\_a\_00638.
61. Jeffrey M Beck, Wei Ji Ma, Roozbeh Kiani, Tim Hanks, Anne K Churchland, Jamie Roitman, Michael N Shadlen, Peter E Latham, and Alexandre Pouget. Probabilistic population codes for Bayesian decision making. *Neuron*, 60(6):1142–1152, dec 2008. ISSN 1097-4199. doi: 10.1016/j.neuron.2008.09.021.
62. Mehrdad Jazayeri and J Anthony Movshon. Optimal representation of sensory information by neural populations. *Nature neuroscience*, 9(5):690–696, may 2006. ISSN 1097-6256. doi: 10.1038/nn1691.
63. Will Dabney, Zeb Kurth-Nelson, Naoshige Uchida, Clara Kwon Starkweather, Demis Hassabis, Rémi Munos, and Matthew Botvinick. A distributional code for value in dopamine-based reinforcement learning. *Nature*, jan 2020. ISSN 0028-0836. doi: 10.1038/s41586-019-1924-6.
64. Armin Lak, Michael Okun, Morgane M Moss, Adam Kepecs, Kenneth D Harris, Matteo Carandini, Armin Lak, Michael Okun, Morgane M Moss, Harsha Gurnani, Karolina Farrell, Miles J Wells, Q Charu, Bai Reddy, Adam Kepecs, Kenneth D Harris, and Matteo Carandini. Dopaminergic and Prefrontal Basis of Learning from Sensory Confidence and Reward Value Article Dopaminergic and Prefrontal Basis of Learning from Sensory Confidence and Reward Value. *Neuron*, pages 1–12, 2020. ISSN 0896-6273. doi: 10.1016/j.neuron.2019.11.018.
65. Stefano Palminteri, Germain Lefebvre, Emma J Kilford, and Sarah Jayne Blakemore. Confirmation bias in human reinforcement learning: Evidence from counterfactual feedback processing. *PLoS computational biology*, 13(8):e1005684, aug 2017. ISSN 15537358. doi: 10.1371/journal.pcbi.1005684.
66. Raymond S Nickerson. Confirmation Bias: A Ubiquitous Phenomenon in Many Guises. *Review of General Psychology*, 2(2):175–220, jun 1998. ISSN 1089-2680. doi: 10.1037/1089-2680.2.2.175.
67. John H Reynolds and David J Heeger. The Normalization Model of Attention, jan 2009. ISSN 08966273.
68. Charles D Gilbert and Mariano Sigman. Brain States: Top-Down Influences in Sensory Processing, jun 2007. ISSN 08966273.
69. Germain Lefebvre, Christopher Summerfield, and Rafal Bogacz. A normative account of confirmatory biases during reinforcement learning. *bioRxiv*, page 2020.05.12.090134, may 2020. ISSN 26928205. doi: 10.1101/2020.05.12.090134.
70. David Attwell and Simon B Laughlin. An energy budget for signaling in the grey matter of the brain, oct 2001. ISSN 0271678X.
71. Lei Shi and Thomas L Griffiths. Neural Implementation of Hierarchical Bayesian Inference by Importance Sampling. Technical report, 2009.
72. Susanne Schreiber, Christian K Machens, Andreas V M Herz, and Simon B Laughlin. Energy-Efficient Coding with Discrete Stochastic Events. *Neural Computation*, 14(6):1323–1346, jun 2002. ISSN 0899-7667. doi: 10.1162/089976602753712963.
73. Marius Usher, Jonathan D Cohen, David Servan-Schreiber, Janusz Rajkowski, and Gary Aston-Jones. The role of locus coeruleus in the regulation of cognitive performance. *Science*, 283(5401):549–554, jan 1999. ISSN 00368075. doi: 10.1126/science.283.5401.549.
74. Eran Eldar, Jonathan D Cohen, and Yael Niv. The effects of neural gain on attention and learning. *Nature Neuroscience*, 16(8):1146–1153, aug 2013. ISSN 10976256. doi: 10.1038/nn.3428.
75. Mark S Gilzenrat, Sander Nieuwenhuis, Marieke Jepma, and Jonathan D Cohen. Pupil diameter tracks changes in control state predicted by the adaptive gain theory of locus coeruleus function. *Cognitive, Affective and Behavioral Neuroscience*, 10(2):252–269, jun 2010. ISSN 15307026. doi: 10.3758/CABN.10.2.252.
76. Marieke Jepma and Sander Nieuwenhuis. Pupil diameter predicts changes in the exploration-exploitation trade-off: Evidence for the adaptive gain theory. *Journal of Cognitive Neuroscience*, 23(7):1587–1596, jul 2011. ISSN 0898929X. doi: 10.1162/jocn.2010.21548.
77. Charles Findling, Vasilisa Skvortsova, Rémi Dromnelle, Stefano Palminteri, and Valentin Wyart. Computational noise in reward-guided learning drives behavioral variability in volatile environments. *Nature Neuroscience*, 22(12):2066–2077, oct 2019. ISSN 15461726. doi: 10.1038/s41593-019-0518-9.
78. Matthew R. Nassar, Katherine M. Rumsey, Robert C. Wilson, Kinjan Parikh, Benjamin Heasley, and Joshua I. Gold. Rational regulation of learning dynamics by pupil-linked arousal systems. *Nature Neuroscience*, 15(7):1040–1046, jul 2012. ISSN 10976256. doi: 10.1038/nn.3130.
79. Michael Browning, Timothy E Behrens, Gerhard Jocham, Jill X O'Reilly, and Sonja J Bishop. Anxious individuals have difficulty learning the causal statistics of aversive environments. *Nature Neuroscience*, 18(4):590–596, apr 2015. ISSN 15461726. doi: 10.1038/nn.3961.
80. Kathryn M Rothenhoefer, Tao Hong, Aydin Alikaya, and William R Stauffer. Rare rewards amplify dopamine responses. *Nature Neuroscience*, pages 1–5, mar 2021. ISSN 1097-6256. doi: 10.1038/s41593-021-00807-7.
81. Ahna R Girshick, Michael S Landy, and Eero P Simoncelli. Cardinal rules: visual orientation perception reflects knowledge of environmental statistics. *Nature Neuroscience*, 14(7):926–932, jun 2011. ISSN 1097-6256. doi: 10.1038/nn.2831.
82. Joseph A Heng, Michael Woodford, and Rafał Polania. Efficient sampling and noisy decisions. *eLife*, 9, sep 2020. ISSN 2050-084X. doi: 10.7554/eLife.54962.
83. Carolina Feher da Silva and Todd A Hare. Humans primarily use model-based inference in the two-stage task. *Nature Human Behaviour*, 4(10):1053–1066, oct 2020. ISSN 23973374. doi: 10.1038/s41562-020-0905-y.
84. Emilio Salinas. How Behavioral Constraints May Determine Optimal Sensory Representations. *PLoS Biology*, 4(12):e387, nov 2006. ISSN 1545-7885. doi: 10.1371/journal.pbio.0040387.
85. Abhishek Banerjee, Giuseppe Parente, Jasper Teutsch, Christopher Lewis, Fabian F Voigt, and Fritjof Helmchen. Value-guided remapping of sensory cortex by lateral orbitofrontal cortex. *Nature*, 585:1–6, sep 2020. ISSN 0028-0836. doi: 10.1038/s41586-020-2704-z.
86. Thomas A Stalnaker, James D Howard, Yuji K Takahashi, Samuel J Gershman, Thorsten Kahnt, and Geoffrey Schoenbaum. Dopamine neuron ensembles signal the content of sensory prediction errors. *eLife*, 8, nov 2019. ISSN 2050084X. doi: 10.7554/eLife.49315.
87. D J Heeger. Normalization of cell responses in cat striate cortex. *Visual neuroscience*, 9(2):181–197, aug 1992. ISSN 0952-5238.
88. Pablo Tano, Peter Dayan, and Alexandre Pouget. A Local Temporal Difference Code for Distributional Reinforcement Learning. Technical report, 2020.
89. Adam S Lowet, Qiao Zheng, Sara Matias, Jan Drugowitsch, and Naoshige Uchida. Distributional Reinforcement Learning in the Brain. *Trends in Neurosciences*, oct 2020. ISSN 01662236. doi: 10.1016/j.tins.2020.09.004.
90. Arthur J Robson and Lorne A Whitehead. Adaptive hedonic utility. Technical report, Working paper, 2018.
91. Gary Aston-Jones and Jonathan D. Cohen. AN INTEGRATIVE THEORY OF LOCUS COERULEUS-NOREPINEPHRINE FUNCTION: Adaptive Gain and Optimal Performance. *Annual Review of Neuroscience*, 28(1):403–450, jul 2005. ISSN 0147-006X. doi: 10.1146/annurev.neuro.28.061604.135709.
92. Christine M. Constantinople, Alex T. Piet, and Carlos D. Brody. An Analysis of Decision under Risk in Rats. *Current Biology*, 0(0), may 2019. ISSN 09609822. doi: 10.1016/j.cub.2019.05.013.
93. Athena Akrami, Charles D. Kopec, Mathew E. Diamond, and Carlos D. Brody. Posterior parietal cortex represents sensory history and mediates its effects on behaviour. *Nature*, 554(7692):368–372, feb 2018. ISSN 0028-0836. doi: 10.1038/nature25510.
94. B W Brunton, M M Botvinick, and C D Brody. Rats and Humans Can Optimally Accumulate Evidence for Decision-Making. *Science*, 340(6128):95–98, apr 2013. ISSN 0036-8075. doi: 10.1126/science.1233912.
95. Brian M. Sweis, Samantha V. Abram, Brandy J. Schmidt, Kelsey D. Seeland, Angus W. MacDonald, Mark J. Thomas, and A. David Redish. Sensitivity to "sunk costs" in mice, rats, and humans. *Science*, 361(6398):178–181, jul 2018. ISSN 10959203. doi: 10.1126/science.aar8644.
96. Bartosz Adam Mackowiak, Filip Matejka, and Mirko Wiederholt. Rational Inattention: A Review. *CEPR Discussion Papers*, 2020.
97. A R Powers, C Mathys, and P R Corlett. Pavlovian conditioning-induced hallucinations result from overweighting of perceptual priors. *Science*, 357(6351):596–600, aug 2017. ISSN 10959203. doi: 10.1126/science.aan3458.
98. Jean Paul Noel, Ling Qi Zhang, Alan A Stocker, and Dora E Angelaki. Aberrant sensory encoding in patients with autism, mar 2020. ISSN 26928205.
99. Mohammad Mehdi Kafashan, Anna W Jaffe, Selmaan N Chetih, Ramon Nogueira, Iñigo Arandia-Romero, Christopher D Harvey, Rubén Moreno-Bote, and Jan Drugowitsch. Scaling of sensory information in large neural populations shows signatures of information-limiting correlations. *Nature Communications*, 12(1):1–16, dec 2021. ISSN 20411723. doi: 10.1038/s41467-020-20722-y.
100. Valeria Aguilón-Rodríguez, Dora Angelaki, Hannah Bayer, Niccolò Bonacchi, Matteo Carandini, Fanny Cazettes, Gaëlle Chapuis, Anne Churchland, Yang Dan, Eric Dewitt, Mayou Fankner, Hamish Forrest, Laura Haetzel, Michael Hausser, Sonja Hofer, Fei Hu, Anup Khandel, Christopher Krasniak, Inês Laranjeira, Zachary Mainen, Guido Meijer, Nathaniel Miska, Thomas Msrisc-Flogel, Masayoshi Murakami, Jean-Paul Noel, Alejandro Pan-Vazquez, Cyrille Rossant, Joshua Sanders, Karolina Socha, Rebecca Terry, Anne Urai, Hernando Vergara, Miles Wells, Christian Wilson, Ilana Witten, Lauren Wool, and Anthony Zador. Standardized and reproducible measurement of decision-making in mice. *bioRxiv*, page 2020.01.17.909838, oct 2020. doi: 10.1101/2020.01.17.909838.
101. Tanmay Nath, Alexander Mathis, An Chi Chen, Amir Patel, Matthias Bethge, and Mackenzie Weygandt Mathis. Using DeepLabCut for 3D markerless pose estimation across species and behaviors. *Nature Protocols*, 14(7):2152–2176, jul 2019. ISSN 17502799. doi: 10.1038/s41596-019-0176-0.
102. Gary Sclar, John H R Maunsell, and Peter Lennie. Coding of image contrast in central visual pathways of the macaque monkey. *Vision Research*, 30(1):1–10, jan 1990. ISSN 00426989. doi: 10.1016/0042-6989(90)90123-3.
103. Joshua I Sanders, Balázs Hangya, and Adam Kepecs. Signatures of a Statistical Computation in the Human Sense of Confidence. *Neuron*, 90(3):499–506, may 2016. ISSN 1097-4199. doi: 10.1016/j.neuron.2016.03.025.
104. Ben Bolker and R Development Core Team. *bbmle: Tools for General Maximum Likelihood Estimation*, 2019.
105. R Core Team. *R: A Language and Environment for Statistical Computing*, 2017.
106. Hirotugu Akaike. A new look at the statistical model identification. *IEEE transactions on automatic control*, 19(6):716–723, 1974.
107. Belinda Y Betsch, Wolfgang Einhäuser, Konrad P Körding, and Peter König. The world from a cat's perspective - Statistics of natural videos. *Biological Cybernetics*, 90(1):41–50, jan 2004. ISSN 03401200. doi: 10.1007/s00422-003-0434-6.

## Supplementary Figure 1

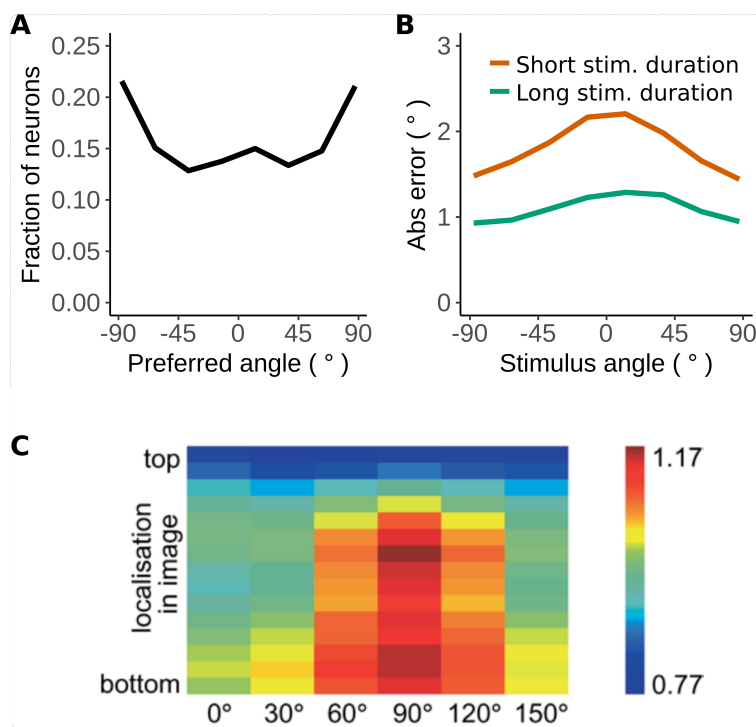

**Mouse V1 has more coding resources at the horizontal angles.** Carsen et al. recorded multi-plane two-photon calcium images from the primary visual cortex of awake mice (47). Stimuli were static gratings rotated at random orientations. **A**) Each neuron has a tuning curve with a strongest response to a preferred orientation. The distribution of preferred orientations across cells shows more neurons prefer horizontal angles. **B**) Carsen et al. used a linear decoder to estimate the stimulus orientation from neuronal activity. They found that coding error is higher for the vertical angles. When the stimulus duration was shortened (100 ms (red) vs. 750 ms (green)) the decoding error of the linear decoder goes up. The results presented in **A**) and **B**) are indicative that mice are more exposed to horizontal than to vertical orientations in the natural world. To simulate the natural exposure over orientations the prior distribution  $\pi(\theta)$  used in our behavioral task is also higher for horizontal than vertical orientations. This allows us to study the effects of changing reward-stimulus contingencies on the coding strategies, in an environment that keeps the natural prior neural codes untouched. **C**) Betsch et al. mounted a camera on top of the head of 4 cats to record natural stimulus videos of freely behaving cats (107). The mean wavelet amplitude of the recorded videos is shown for 6 orientations on the x-axis. The y-axis represents the height in the recorded image. Most of the visual field is dominated by horizontal orientations. Although this study was performed using cats instead of mice, it is interesting to observe that horizontal orientations dominate the natural environment of this species.

## Supplementary Figure 2

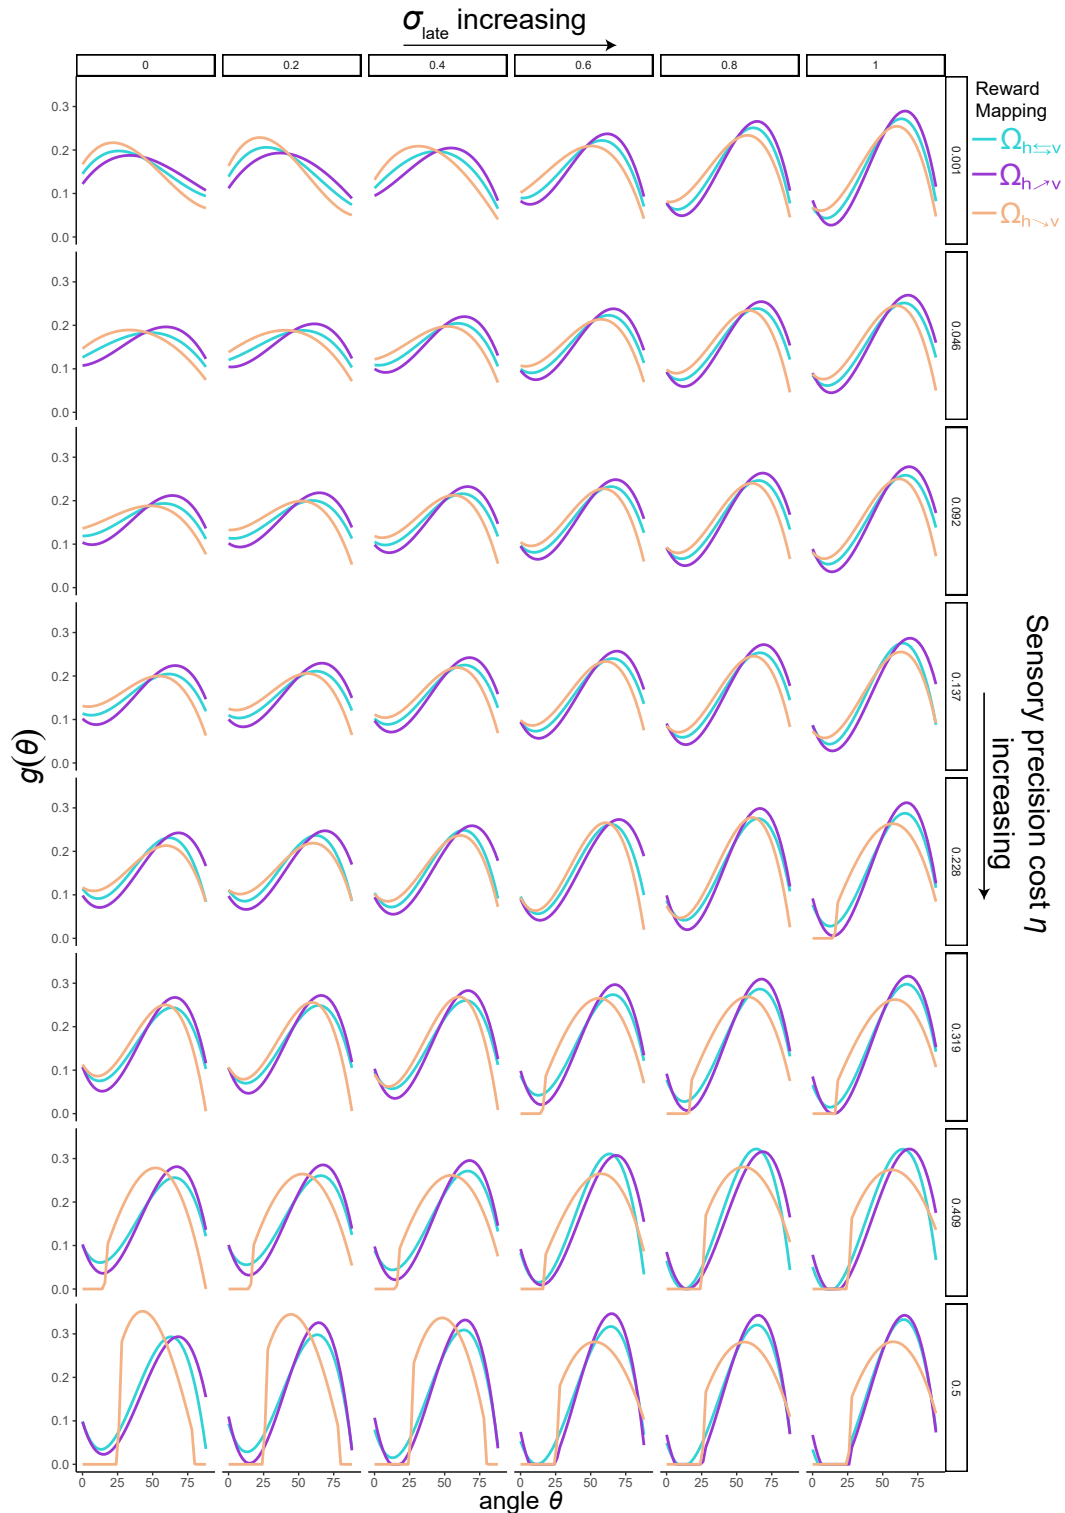

**Optimal  $g(\theta)$  depends on precision costs and noise.** The way in which the system should invest in sensory encoding for a particular portion of the stimulus space depends on both precision costs  $\eta$  (increasing from top to bottom) and late noise  $\sigma_{\text{late}}$  (increasing from left to right). An interesting property of the rational inattention model is that as both  $\eta$  and  $\sigma_{\text{late}}$  increase, the less resources the system invests on regions of the stimulus space with higher density. This demonstrates important differences between solutions of efficient coding that that assume low levels of noise in the encoder (e.g., top left panel) and solutions where the low-noise regime is dropped.



### Supplementary Figure 3

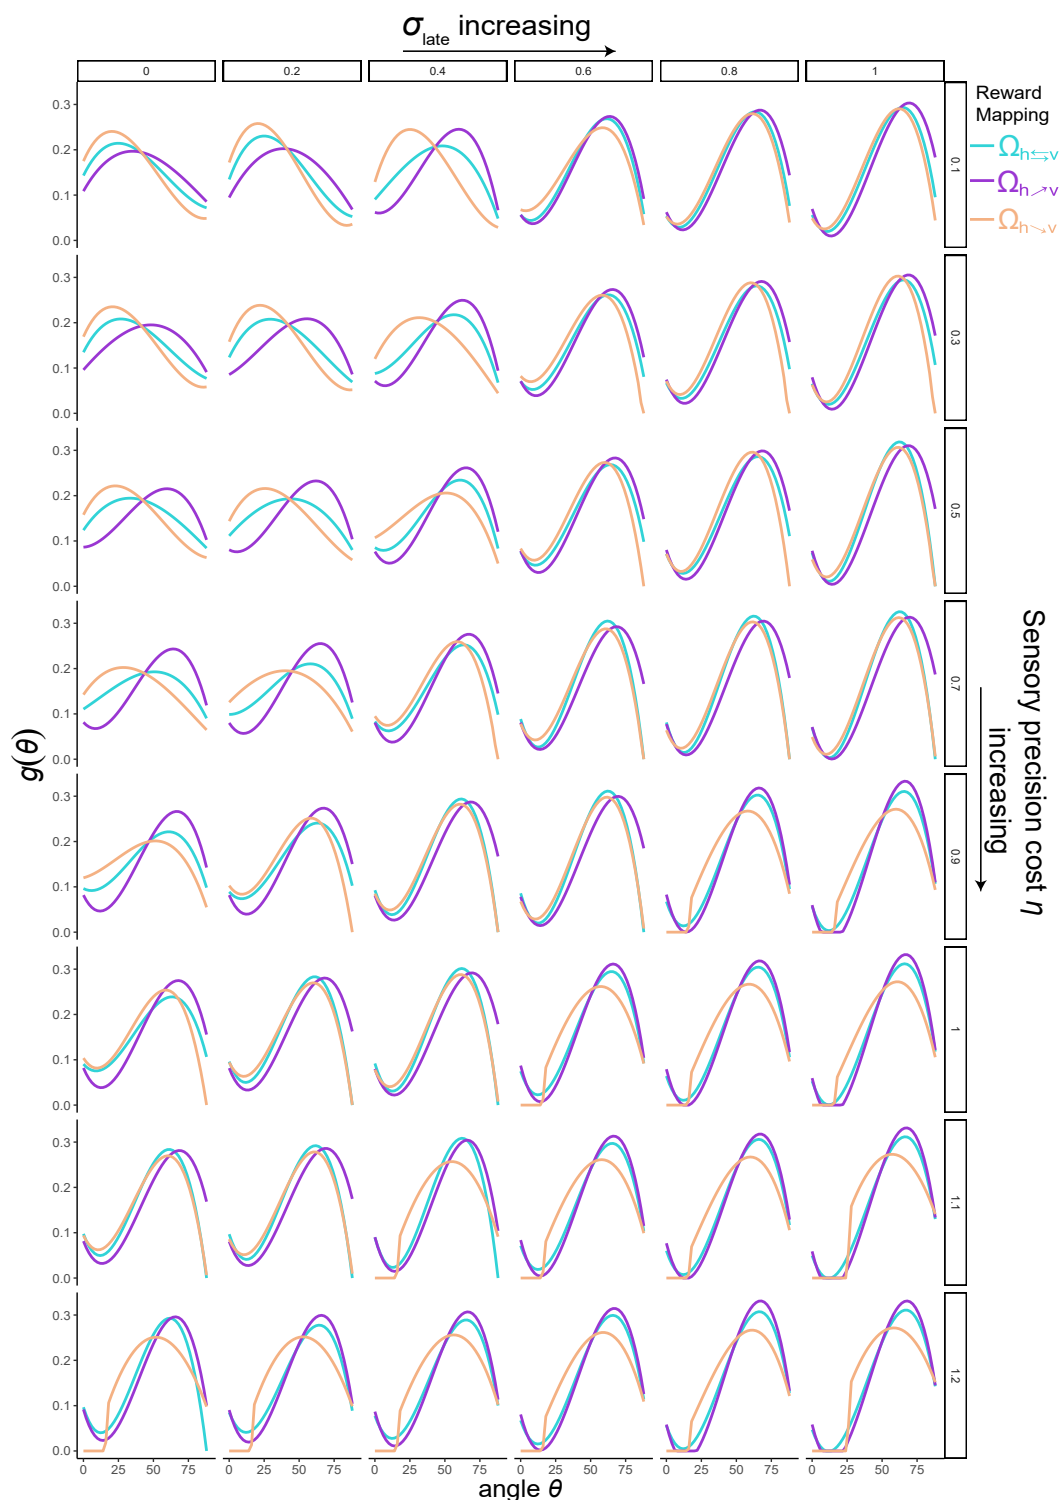

**Optimal  $g(\theta)$  using entropy as cost function.** This figure shows similar information to Supplementary Figure 2, with the difference that now the cost function is the expected reduction in entropy  $\mathbb{E}[H(\theta | m)]$ . While there are slight differences in the solutions for  $g(\theta)$ , these are in general qualitatively similar to the solutions for using precision as cost function. The reason is that both cost functions increase with the use of more resources. However, the relationship between expected precision and entropy reduction is not linear (see Supplementary Figure 4).

## Supplementary Figure 4

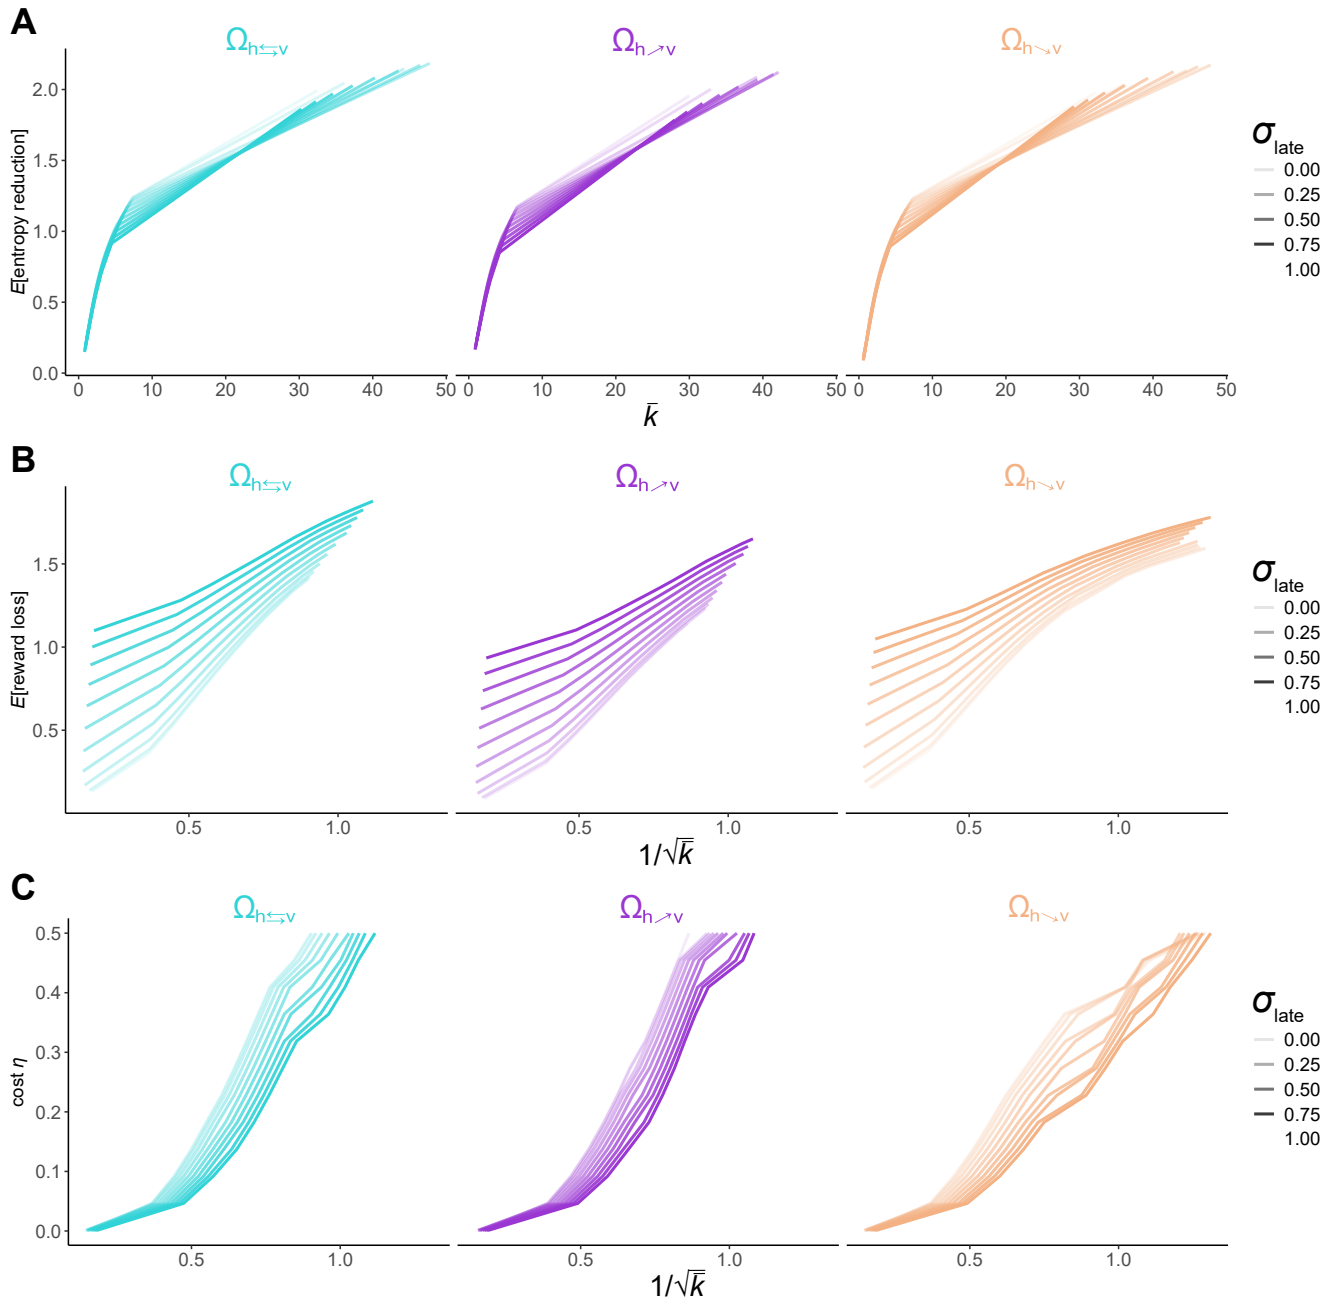

## Supplementary Figure 5

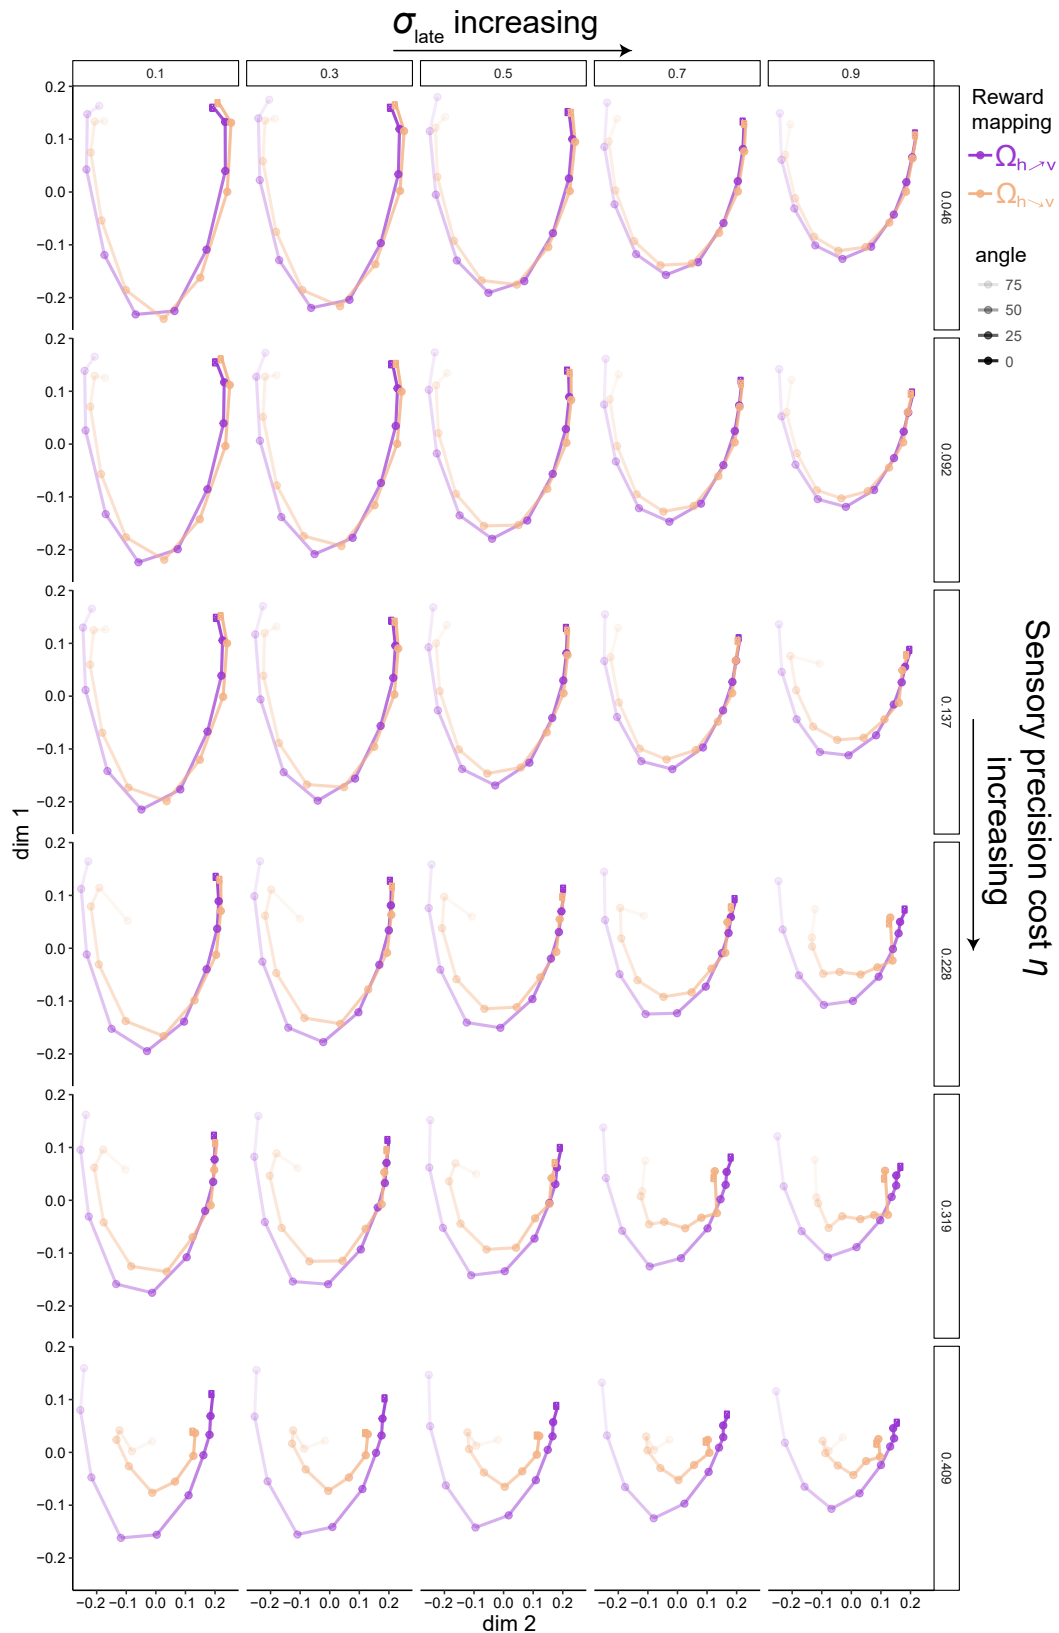

**Geometric analyses of psychophysical performance of the rational inattention model allowing sensory resources  $g$  to be adaptive across the sensory space.** In order to have a better overview of predicted discriminability performance across all pairwise combinations of input stimuli as a function of precision cost  $\eta$  and downstream noise  $\sigma_{\text{late}}$ , we implemented a

multidimensional scaling (MDS) analysis. For clarity in the presentation of these analyses, we considered only environments  $\Omega_{R:h \searrow v}$  and  $\Omega_{R:h \nearrow v}$ , which are diametrically orthogonal in terms of stimulus-reward mappings. The introduction of MDS analyses is appealing because it provides an intuitive interpretation of behavioral performance. Here, each dot represents an input stimulus (where each angle in is represented with a different transparency level). The distance between a pair of nodes in the manifold then represents degree of discriminability between the two angles. In our task the MDS various important features of psychophysical performance: (i) The higher the sensory precision cost  $\eta$  and downstream noise  $\sigma_{\text{late}}$  the shorter the distance between dots, thus indicating lower levels of overall discriminability. (ii) In environment  $\Omega_{R:h \nearrow v}$  discriminability at horizontal angles is smaller relative to environment  $\Omega_{R:h \searrow v}$ , and vice-versa for vertical angles. (iii) For a given level of sensory precision cost  $\eta$  and downstream noise  $\sigma_{\text{late}}$  psychophysical performance is better in environment  $\Omega_{R:h \nearrow v}$  relative to  $\Omega_{R:h \searrow v}$ . This prediction emerges in the rational inattention framework because of the resource constraints and inference process considered here. For a given level of sensory and decision precision, reward expectation in environment  $\Omega_{R:h \nearrow v}$  is higher. Thus our rational inattention model generates a set of testable predictions that can be verified with the empirical data.

## Supplementary Figure 6

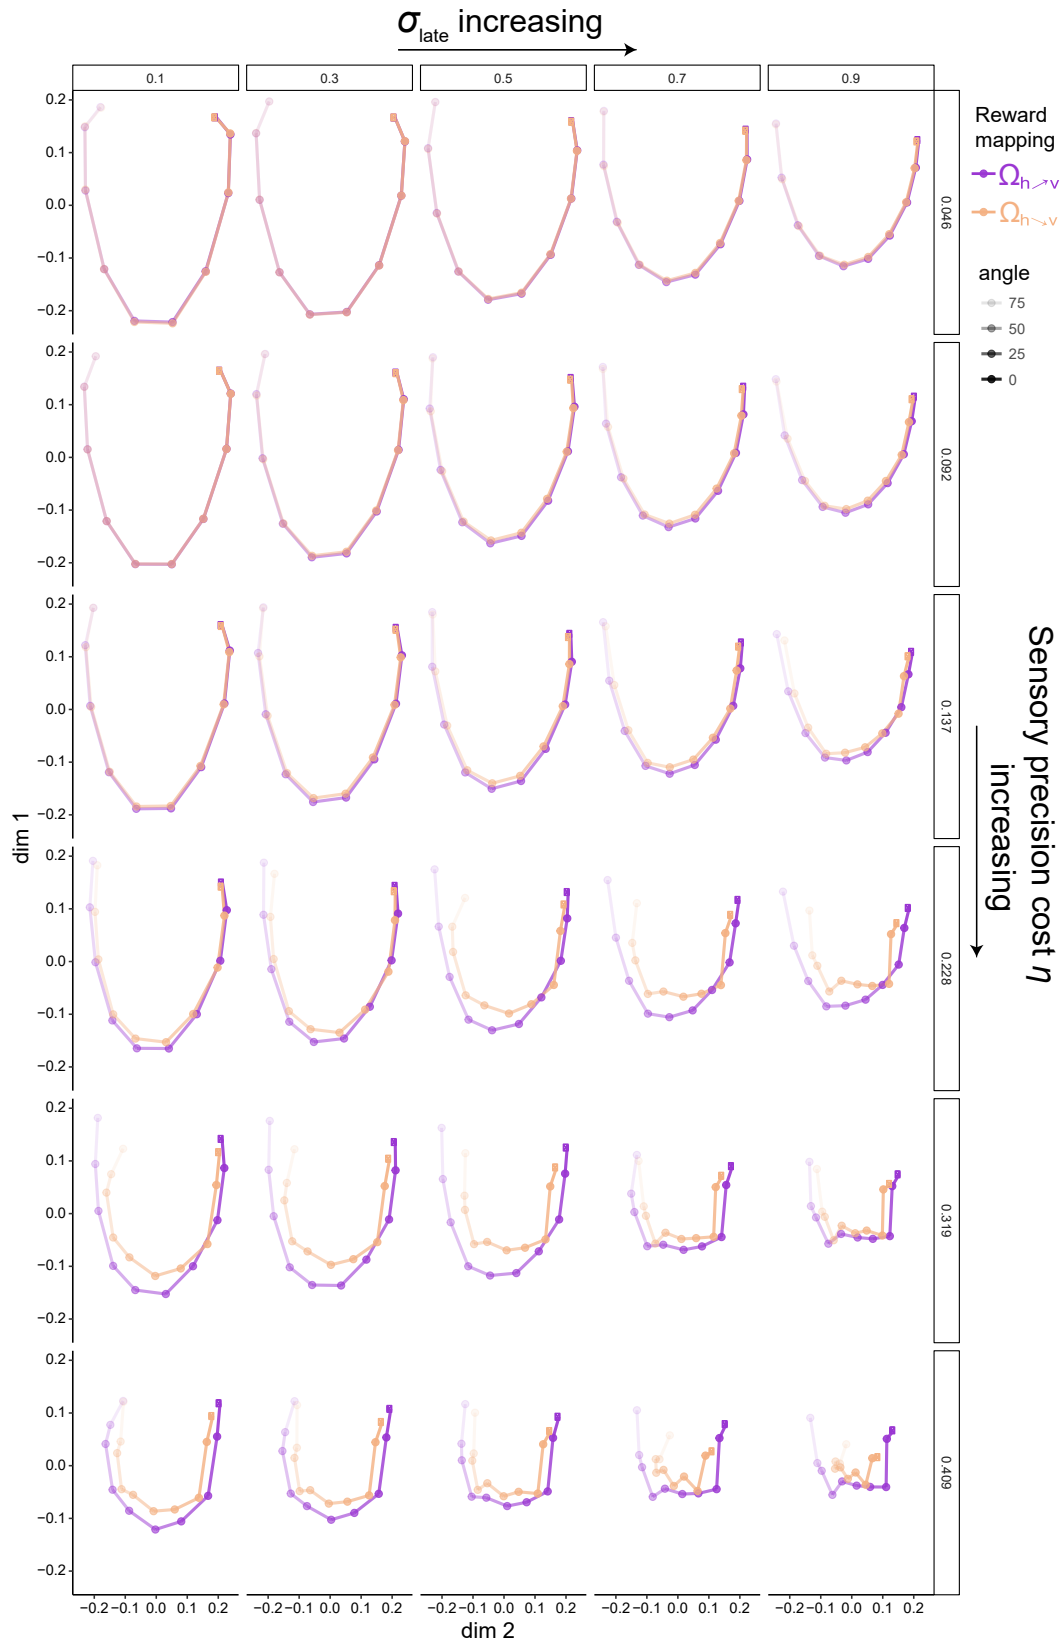

**Geometric analyses of psychophysical performance of the rational inattention model assuming uniform resource allocation  $g$  across the sensory space.** Here con conducted MDS analyses in the same way as conducted in Supplementary Figure

5, but this time assuming uniform resource allocation  $g$  across the sensory space. While for a given level of sensory precision cost  $\eta$  and downstream noise  $\sigma_{\text{late}}$  psychophysical performance is better in environment  $\Omega_{R:h \nearrow v}$  relative to  $\Omega_{R:h \searrow v}$ , and thus similar to the prediction presented in Supplementary Figure 5 (a general prediction of the rational inattention framework), the degree discriminability is relatively constant across the sensory space. Additionally, for the same levels of sensory precision cost  $\eta$  and downstream noise  $\sigma_{\text{late}}$ , the degree of discriminability is larger for the variable gain  $g$  rational inattention model (Supplementary Figure 5) relative to the uniform gain  $g$  model (this figure). This is qualitatively evident by comparing the overall distance between the nodes of the manifold across Figures S5 and S6. Thus the two types of rational inattention models provide distinct qualitative features that can be qualitatively compared against empirical data.

## Supplementary Figure 7

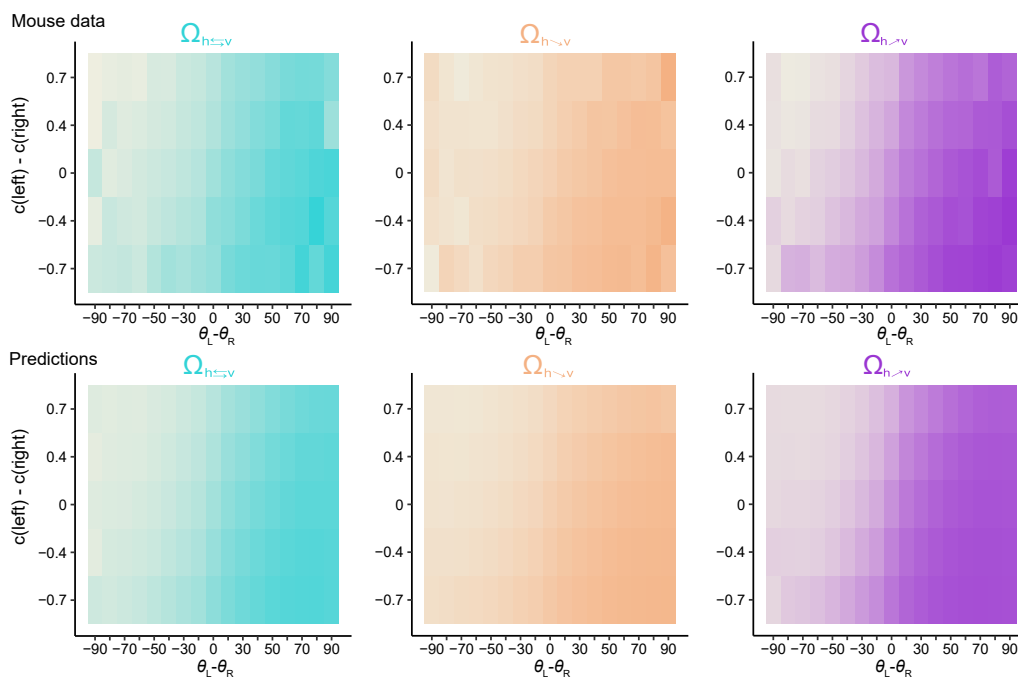

**Mouse data and rational inattentive model predictions for difference in contrast levels.** Heatplots for each reward environment (denoted on top of heatplot and color coded) show probability of choosing the left stimulus at each contrast difference in the study vs. the angle difference (trial difficulty). Top three plots show real mouse data and bottom three show predictions of the static model. The contrast differences between two stimuli that were 0.4 and 0.3 were grouped together for the purpose of this plot, and are marked 0.4 on the y axis. Preference for higher contrast side stimuli as a function of difficulty, which could be interpreted as risk aversiveness, is observed in these plots, as well as the ability of our model to predict it.

## Supplementary Figure 8

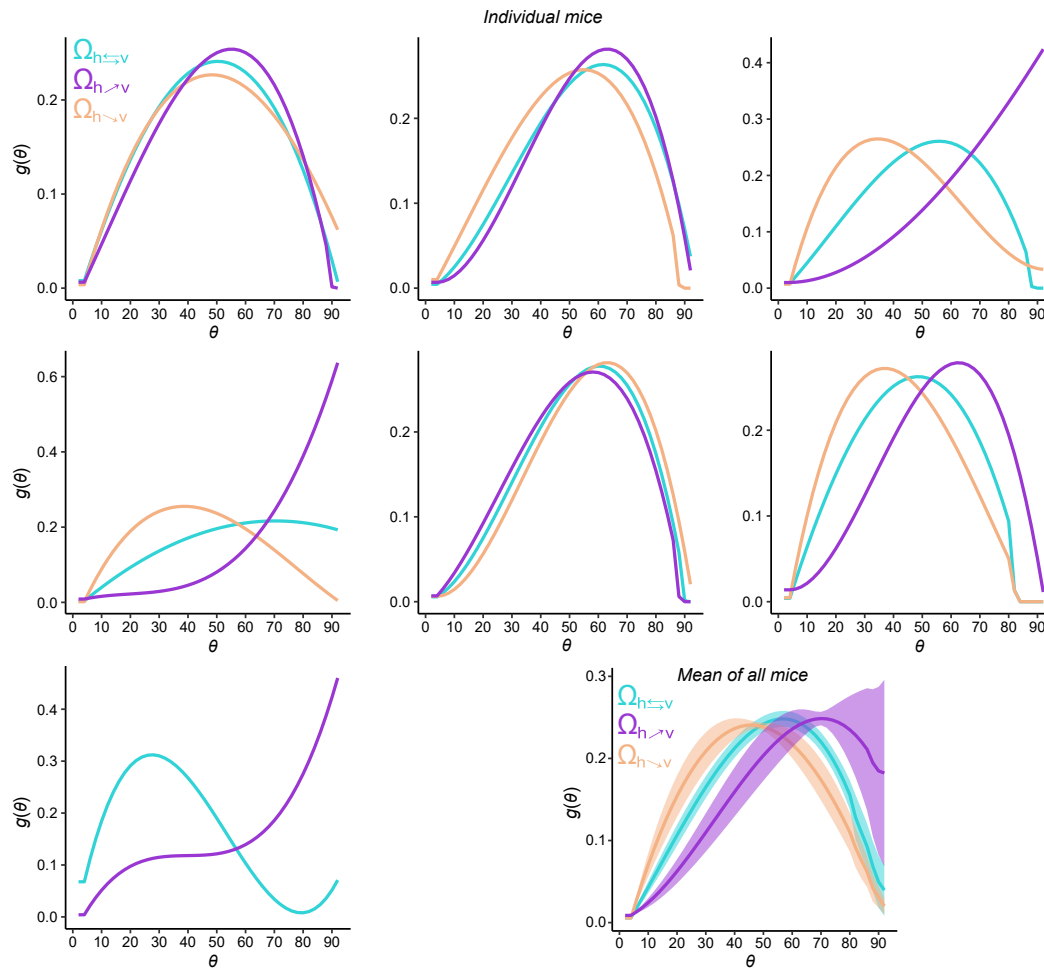

**Individual animals show adaptation to different reward environments** Resource allocation functions  $g(\theta)$  for each reward environment  $\Omega$  and each individual mouse. Bottom right plot shows the means of all mice that had all reward environments (top two rows). Shaded areas show standard 95% bootstrap CIs. Individual animals show the trend of increasing the resources allocated areas of stimulus space with higher reward sizes. Gain shifts to more horizontal orientations in  $\Omega_{R:h \searrow v}$ , as more reward is dedicated to that portion of stimulus space in this reward condition. The effect is the opposite for  $\Omega_{R:h \nearrow v}$ , and in between those two is the  $\Omega_{R:h \leftrightarrow v}$ , as would be intuitive looking at reward mappings in Figure 1E.



## Supplementary Figure 9

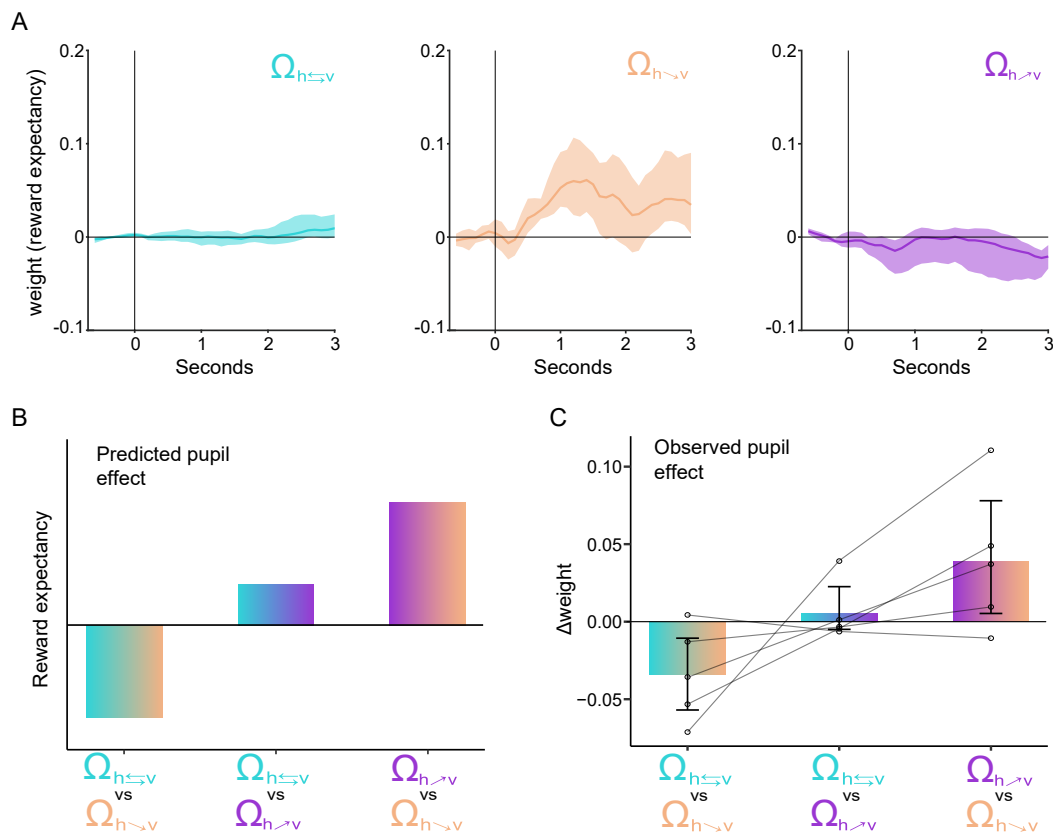

**Reward expectancy effect on pupil.** (A) Weights of expected reward effect on phasic pupil response over time for each reward environment  $\Omega$ . Aligned to stimulus onset. Shaded areas show 95% bootstrap CIs. (B) Predicted reward environment pairwise differences in effect of reward expectancy on phasic pupil response. (C) Observed pairwise reward environment differences in weights of expected reward effect on phasic pupil response. Averaged from stimulus onset to 3 seconds post onset. Error bars show 95% CIs and lines show differences in individual mice.

## Supplementary Table 1

| Reward Mappings                               | Correct side angle (degrees) |     |     |     |     |     |     |     |     |    |
|-----------------------------------------------|------------------------------|-----|-----|-----|-----|-----|-----|-----|-----|----|
|                                               | 0                            | 10  | 20  | 30  | 40  | 50  | 60  | 70  | 80  | 90 |
| $\Omega_{R:h \nearrow v}, \mu\text{L}$        | 1                            | 1.8 | 2.6 | 3.3 | 4.1 | 4.9 | 5.7 | 6.4 | 7.2 | 8  |
| $\Omega_{R:h \searrow v}, \mu\text{L}$        | 8                            | 7.2 | 6.4 | 5.7 | 4.9 | 4.1 | 3.3 | 2.6 | 1.8 | 1  |
| $\Omega_{R:h \leftrightarrow v}, \mu\text{L}$ | 5                            | 5   | 5   | 5   | 5   | 5   | 5   | 5   | 5   | 5  |

**Stimulus-reward mapping.** The amounts of milkshake dispensed at a given correct side angle in a given reward environment  $\Omega$ . In  $\Omega_{R:h \nearrow v}$ , reward size increases from horizontal to vertical. The opposite is true for the  $\Omega_{R:h \searrow v}$  mapping, whereas same size of reward is assigned to all angles in the  $\Omega_{R:h \leftrightarrow v}$  reward mapping condition.
